# Supplementary material for: Anticholinergic and sedative drug burden in community-dwelling older people: a national database study
Source: PubMed Central journal article supplement — BMJ Open. 2018 Jul 6;8(7):e022500. doi: 10.1136/bmjopen-2018-022500 (PMC6045724; doi:10.1136/bmjopen-2018-022500), 2018-07-06
Supplement: bmjopen-2018-022500.draft_revisions.pdf [file bmjopen-2018-022500.draft_revisions.pdf]

# BMJ Open

BMJ Open is committed to open peer review. As part of this commitment we make the peer review history of every article we publish publicly available.

When an article is published we post the peer reviewers' comments and the authors' responses online. We also post the versions of the paper that were used during peer review. These are the versions that the peer review comments apply to.

The versions of the paper that follow are the versions that were submitted during the peer review process. They are not the versions of record or the final published versions. They should not be cited or distributed as the published version of this manuscript.

BMJ Open is an open access journal and the full, final, typeset and author-corrected version of record of the manuscript is available on our site with no access controls, subscription charges or pay-per-view fees (<http://bmjopen.bmj.com>).

If you have any questions on BMJ Open's open peer review process please email [info.bmjopen@bmj.com](mailto:info.bmjopen@bmj.com)

# BMJ Open

## Anticholinergic and sedative drug burden in community-dwelling older people: a cross-sectional national database study

|                               |                                                                                                                                                                                                                                                                                                                                                                                                                                                                                                                                                                                                                        |
|-------------------------------|------------------------------------------------------------------------------------------------------------------------------------------------------------------------------------------------------------------------------------------------------------------------------------------------------------------------------------------------------------------------------------------------------------------------------------------------------------------------------------------------------------------------------------------------------------------------------------------------------------------------|
| Journal:                      | <i>BMJ Open</i>                                                                                                                                                                                                                                                                                                                                                                                                                                                                                                                                                                                                        |
| Manuscript ID                 | bmjopen-2018-022500                                                                                                                                                                                                                                                                                                                                                                                                                                                                                                                                                                                                    |
| Article Type:                 | Research                                                                                                                                                                                                                                                                                                                                                                                                                                                                                                                                                                                                               |
| Date Submitted by the Author: | 20-Feb-2018                                                                                                                                                                                                                                                                                                                                                                                                                                                                                                                                                                                                            |
| Complete List of Authors:     | Byrne, Catherine; Royal College of Surgeons in Ireland Division of Population Health Sciences,<br>Walsh, Caroline; Royal College of Surgeons in Ireland Division of Population Health Sciences<br>Cahir, Caitriona; Royal College of Surgeons in Ireland Division of Population Health Sciences<br>Ryan, Cristín; University of Dublin Trinity College, School of Pharmacy and Pharmaceutical Sciences<br>Williams, David; Royal College of Surgeons in Ireland and Beaumont Hospital, Geriatric and Stroke Medicine<br>Bennett, Kathleen; Royal College of Surgeons in Ireland Division of Population Health Sciences |
| Keywords:                     | Drug Burden Index, older people, anticholinergic burden, sedative burden, PRIMARY CARE, pharmacoepidemiology                                                                                                                                                                                                                                                                                                                                                                                                                                                                                                           |
|                               |                                                                                                                                                                                                                                                                                                                                                                                                                                                                                                                                                                                                                        |

SCHOLARONE™  
Manuscripts

Only

1  
2  
3  
4 **Anticholinergic and sedative drug burden in community-**  
5 **dwelling older people: a cross-sectional national database**  
6 **study**  
7  
8  
9

10 Catherine J Byrne<sup>1</sup>, Caroline Walsh<sup>1</sup>, Caitriona Cahir<sup>1</sup>, Cristin Ryan<sup>2</sup>, David J Williams<sup>3</sup>, Kathleen Bennett<sup>1</sup>

11  
12 <sup>1</sup>*Division of Population Health Sciences, Royal College of Surgeons in Ireland, Dublin, Ireland;* <sup>2</sup>*School of*  
13 *Pharmacy and Pharmaceutical Sciences, Trinity College, Dublin, Ireland;* <sup>3</sup>*Department of Geriatric and*  
14 *Stroke Medicine, Royal College of Surgeons in Ireland and Beaumont Hospital, Dublin, Ireland*  
15  
16

17 Correspondence to: Dr. Catherine Byrne; catherinebyrne@rcsi.com  
18  
19  
20  
21  
22  
23  
24  
25  
26  
27  
28  
29  
30  
31  
32  
33  
34  
35  
36  
37  
38  
39  
40  
41  
42  
43  
44  
45  
46  
47  
48  
49  
50  
51  
52  
53  
54  
55  
56  
57  
58  
59  
60

## Abstract

**Objectives:** The Drug Burden Index (DBI) tool quantifies individual exposure to anticholinergic and sedative medications. The DBI has been internationally validated against adverse health outcomes in older people. DBI exposure has not been reported in the Irish older population. This study aimed to: (i) develop a list of drugs with clinically significant anticholinergic and/or sedative effects (DBI medications) relevant to Ireland; (ii) examine, using the DBI formula, the prevalence of exposure to DBI medications in Irish older people; and (iii) explore patient factors associated DBI exposure.

**Design:** A cross-sectional national pharmacy claims database study.

**Setting:** Community setting using the General Medical Services (GMS) scheme pharmacy claims database maintained by the Health Service Executive Primary Care Reimbursement Services.

**Participants:** Irish older individuals (aged  $\geq 65$  years), enrolled in the GMS scheme, and dispensed at least one prescription item in 2016 ( $n=428,516$ ).

**Main outcome measures:** Prevalence of exposure to DBI medications and patient factors associated with DBI exposure.

**Results:** 282,874 (66%) of the GMS population aged  $\geq 65$  years were exposed to at least one DBI medication in 2016. Prevalence of exposure to DBI medications was significantly higher in females than males (females 71.6% vs. males 58.7%, adjusted OR 1.65, 95% CI 1.63-1.68). Prevalence of DBI exposure increased progressively with the number of chronic drugs used, rising from 42.7% of those prescribed 0-4 chronic drugs to 95.4% of those on  $\geq 12$  chronic drugs (adjusted OR 27.8, 95% CI 26.7-29.0). The most frequently used DBI medications were codeine/paracetamol combination products (20.1% of patients), tramadol (11.5%), zopiclone (9.5%), zolpidem (8.5%), pregabalin (7.9%) and alprazolam (7.8%).

**Conclusions:** The majority of older people in Ireland are exposed to medications with anticholinergic and/or sedative effects, particularly females and those with multiple comorbidities. The high use of low-dose codeine/paracetamol combination products, Z-drugs and benzodiazepines suggests there are opportunities for deprescribing.

## Strengths and limitations of this study

- This was a large national cross-sectional study of exposure to medications with anticholinergic or sedative effects (DBI medications) in Irish community-dwelling older people.
- A consensus list of DBI medications available in Ireland was developed and used to establish the prevalence of exposure in a highly representative population.
- The main limitations of this study result from the constraints of using pharmacy claims data, which do not include information about the clinical indication for prescriptions, and therefore it is not possible to assess the appropriateness of DBI medications.
- All medications dispensed were included in the analyses but it is not possible to confirm whether the medications were consumed.

## Introduction

Medications with anticholinergic and sedative effects carry significant risks of adverse events in older people.<sup>1</sup> However, these medications are used to treat a range of conditions that occur commonly in later life such as mental illness, sleep disturbances, nausea, pain and urinary incontinence.<sup>2</sup> In older patients, particularly those with comorbidities, this may result in an additive anticholinergic and sedative burden.<sup>3</sup> Anticholinergic medications have a range of adverse effects including dry mouth, blurred vision, constipation and urinary retention (peripheral effects), as well as dizziness, confusion, reduced concentration and delirium (central effects).<sup>4</sup> Drugs with sedative effects also cause central nervous system adverse effects, including sedation, memory and psychomotor impairment, and impairment of balance control.<sup>5-7</sup> Older people are more sensitive to these adverse effects due to age-related pharmacokinetic and pharmacodynamic changes.<sup>1</sup> In community-dwelling older people, anticholinergic and sedative drugs have been linked with an increased risk of falls,<sup>8,9</sup> functional impairment,<sup>10,11</sup> and cognitive decline.<sup>12,13</sup> Evidence to support the efficacy of some anticholinergic and sedative medications often does not justify their risks in older people.<sup>14,15</sup> Evidence suggests that deprescribing of some of these medications, such as psychotropic drugs, may result in positive patient health outcomes.<sup>16-18</sup> Therefore, reducing the inappropriate use of these medications in older people is an important public health issue.

Several tools have been developed to evaluate exposure to anticholinergic or sedative medicines. One such tool is the Drug Burden Index (DBI), which is unique when compared with other tools, as it accounts for both cumulative medication exposure and for the patient's dose.<sup>19</sup> The DBI uses the drug monograph to determine whether a drug has clinically significant anticholinergic or sedative effects by considering the pharmacology and side effect profile of the drug. The minimum efficacious dose, which is a key component of the DBI calculation, is determined according to the country-specific approved product information.<sup>2</sup> An accumulating body of evidence supports the validity of the DBI tool in terms of predicting functional impairment in older people, with observational studies from different international settings independently associating DBI exposure with poorer physical function,<sup>7,19,20</sup> frailty,<sup>21</sup> falls,<sup>15,22</sup> healthcare utilisation,<sup>15,23</sup> and, in some studies, mortality.<sup>15,23</sup>

In order to develop strategies to minimise the inappropriate use of anticholinergic and sedative medications in older people, a reliable measure for describing the magnitude of the problem and the identification of targets for improved prescribing of these medications is necessary. However, the prevalence of exposure to anticholinergic and sedative drugs using the DBI tool has not been reported in the Irish older population. Additionally, the list of DBI medications and their minimum effective daily doses needs to be tailored for the specific country of investigation, as the availability of drugs and their minimum recommended daily dose may differ between countries due to regulatory factors as well as factors that may influence drug effects such as genetics, ethnicity, diet and environment.<sup>2</sup> Furthermore, a complete list of DBI medications and minimum effective daily doses to use for screening purposes, which could be adapted to the specific country and periodically updated, has not been published. This study aimed to: (i) develop a list of drugs with clinically significant anticholinergic and/or sedative effects (DBI medications) and their corresponding minimum recommended daily doses in older people relevant

1  
2  
3  
4 to Ireland; (ii) examine, using the DBI formula, the prevalence of exposure to DBI medications in Irish  
5 community-dwelling older people; and (iii) explore patient factors of age, gender and comorbidity  
6 associated with increased exposure to DBI medications.  
7

## 8 **Methods**

### 9 ***Study population and design***

10  
11  
12  
13 This was a cross-sectional national pharmacy claims database study in the community setting. Data from  
14 the Irish Health Service Executive (HSE) Primary Care Reimbursement Services (PCRS) pharmacy claims  
15 database was used to identify the study cohort: older people (aged 65 years and over) enrolled in the  
16 General Medical Services (GMS) scheme in Ireland, who had been dispensed at least one prescription in  
17 2016. The HSE-PCRS reimburse pharmacists for the provision of prescription medication in Ireland,  
18 through a number of schemes, including the GMS scheme. The GMS database represents the single  
19 largest pharmacy claims dataset in Ireland. The GMS scheme provides mainly free health cover (a small  
20 co-payment on medicines was introduced in 2010) for those eligible and covers approximately 40% of  
21 the general Irish population. Eligibility for the GMS scheme is means tested, with a considerably higher  
22 threshold for those over 70 years of age, ensuring approximately 80% of this age group are considered  
23 eligible for the scheme.<sup>24,25</sup>  
24  
25  
26  
27

28 Medicines in the HSE-PCRS pharmacy claims database are coded according to the World Health  
29 Organisation Anatomical Therapeutic Chemical (ATC) classification system.<sup>26</sup> Permission to use the  
30 anonymised HSE-PCRS data for research purposes was obtained from the HSE-PCRS. Ethics committee  
31 approval was not required as all data were anonymised.  
32  
33

### 34 ***Measuring anticholinergic and sedative exposure***

35  
36  
37 The DBI tool was used to calculate cumulative exposure to medications with clinically significant  
38 anticholinergic and/or sedative effects (DBI medications) dispensed from 1 January to 31 December  
39 2016. For this analysis, all DBI medications (with the dose information) were identified using relevant  
40 ATC codes and subsequently extracted from the pharmacy claims database.  
41  
42

### 43 ***List of DBI medications***

44  
45 Medications with potential anticholinergic and/or sedative effects, available in Ireland, were identified  
46 by reviewing several drug monographs,<sup>27-31</sup> and previously published studies.<sup>19,20,32</sup> This list was then  
47 refined according to definitions developed by consensus between a pharmacist (CB) and a clinical  
48 pharmacologist (DW) as follows: A medication was considered to have clinically significant  
49 anticholinergic effects if the pharmacological profile of the drug included anticholinergic activity  
50 (blocking activity at muscarinic receptors) as well as a side effect profile consistent with anticholinergic  
51 effects listed in the product literature. A medication was considered to have clinically significant  
52 sedative effects if drowsiness (or a similar description) was listed as a common (occurring in >1/100 and  
53  
54  
55  
56  
57  
58  
59  
60

1  
2  
3  
4 <1/10 users) or very common (occurring in >1/10 users) adverse effect in the product literature. Topical  
5 preparations without significant systemic effects were excluded as per previous studies.<sup>19,20</sup>  
6

7 The minimum effective daily dose was decided by consensus between two pharmacists (CB, CW) after  
8 independent review of drug monographs.<sup>27-31</sup> The following assumptions were made in determining the  
9 minimum effective daily dose:  
10

11 i) The minimum effective daily dose in older people was used when stated; otherwise, the minimum  
12 effective daily adult dose was used.  
13

14 ii) For drugs initiated at a low dose and titrated to effect, the minimum effective daily maintenance dose  
15 was used.  
16

17 iii) For drugs with several indications, and when doses varied depending on the indication, the minimum  
18 effective daily dose across all indications was used, except for opiates where the minimum effective  
19 daily dose was based on the analgesic dose.  
20

21 iv) For drugs available alone and in combination with other drugs, the minimum effective daily dose for  
22 the anticholinergic/sedative drug alone was used to define the minimum effective daily dose for the  
23 anticholinergic/sedative drug in the combination product.  
24

25 v) For analgesic drugs with different doses for breakthrough pain and chronic pain, the minimum  
26 effective daily dose for chronic pain was used.  
27

28 vi) For drugs administered on an 'as needed' basis, the minimum effective daily dose was the minimum  
29 effective single dose multiplied by the minimum number of times the dose is normally repeated in 24  
30 hours.  
31

32 vii) For drugs administered by more than one route, the minimum effective daily dose for the oral route  
33 (or the most commonly used route if not administered orally) was used as the reference dose. The  
34 reference dose was converted to an equivalent dose for other available routes of administration based  
35 on reported conversion factors or bioavailability data.<sup>27,28,30,31</sup>  
36

#### 37 *Calculating DBI exposure*

38 Total DBI exposure for each individual was calculated as the sum of exposure to any DBI medication  
39 dispensed in 2016 using the following equation:<sup>19</sup>  
40

$$41 \text{DBI} = \sum D / (\delta + D)$$

42 where  $D$  is the daily dose taken by the individual patient, and  $\delta$  is the minimum effective daily dose for  
43 that drug. The daily dose taken by the individual patient for each DBI medication was estimated by  
44 multiplying the strength and total quantity dispensed in 2016, and then normalising by dividing by 365  
45 days.<sup>15</sup> DBI exposure was also quantified for each patient over one year including only chronic DBI  
46  
47  
48  
49  
50  
51  
52  
53  
54  
55  
56  
57  
58  
59  
60



1  
2  
3  
4 medications, defined as at least three prescription items dispensed in the year for the same fourth-level  
5 ATC code (e.g. N02AJ).<sup>33</sup>

### 7 **Statistical Analysis**

9 Exposure to DBI medications was categorized dichotomously as unexposed (DBI=0) and exposed  
10 (DBI>0). Prevalence rates and associated 95% CIs for GMS eligible patients aged 65 years and over with  
11 at least one prescription dispensed in 2016 (DBI exposure) were calculated. Logistic regression was used  
12 to examine the association between DBI exposure and the following patient variables: age at first  
13 dispensing in 2016 [categorized into 65-69 (reference), 70-74, 75-79, and ≥80 years], gender [male  
14 (reference), female] and number of co-prescribed chronic medications over the year [categorized as 0-4  
15 (reference), 5-7, 8-11, and ≥12 chronic medications]. Chronic medication was defined as receiving at  
16 least three prescription items dispensed in the year with the same second-level ATC code (e.g. N02),  
17 relating to only the following first-level codes: A (alimentary tract and metabolism), B (blood and blood-  
18 forming organs), C (cardiovascular system), G (genito urinary system and sex hormones), H (systemic  
19 hormonal preparation, excluding sex hormones and insulins), L (antineoplastic and immunomodulating  
20 agents), M (musculo-skeletal system), N (nervous system), R (respiratory system) and S (sensory organs),  
21 and excluding those on the denominator of the DBI exposure.<sup>33,34</sup> Adjusted odds ratios (ORs) and 95%  
22 CIs were computed. Statistical significance at  $P<0.05$  was assumed. Statistical analyses were conducted  
23 using SAS® v 9.4 (SAS Institute Inc., Cary, NC, USA).

### 29 **Patient involvement**

31 No patients were involved in setting the research question or the outcome measures, nor were they  
32 involved in developing plans for design or implementation of the study. No patients were asked to  
33 advise on interpretation or writing up of results. There are no plans to disseminate the results of the  
34 research to study participants or the relevant patient community.

### 38 **Results**

40 The final list of DBI medications, and their minimum effective daily doses, is provided in Supplementary  
41 Table S1. This list included 156 medications (15 with anticholinergic effects only, 87 with sedative effects  
42 only, and 54 with both anticholinergic and sedative effects).

44 In total, 282,874 (66%) of the 428,516 GMS eligible population aged 65 years and over in receipt of any  
45 claim during 2016 received at least one claim for a DBI medication. The prevalence of chronic DBI  
46 exposure was 54.0%. Median (IQR) DBI score over the year was 0.52 (0.11-1.03).

48 Table 1 shows the prevalence of patients with DBI exposure in 2016 by a range of patient characteristics.  
49 Females were significantly more likely to have DBI exposure compared to males (females 71.6% vs.  
50 males 58.7%, adjusted OR 1.65, 95% CI 1.63, 1.68). Prevalence of DBI exposure increased noticeably with  
51 the number of chronic drugs used, rising progressively from 42.7% of those prescribed 0-4 chronic drugs  
52 receiving a DBI prescription to 95.4% of those on ≥12 chronic drugs (adjusted OR 27.81, 95% CI 26.72,  
53  
54  
55  
56  
57  
58  
59

28.96). Those aged 80 years and over had a significantly higher prevalence of DBI exposure than those aged <80 years ( $\geq 80$  years 71.5% vs. <80 years 63.5%). In multivariate analysis, the association between increasing age and DBI exposure was diminished (adjusted OR 0.82, 95% CI 0.81, 0.84).

Table 2 shows the 10 most frequently used DBI medications by Irish older people in 2016. Codeine and tramadol were the most commonly used medications with sedative effects (20.1% and 11.5% of patients, respectively). Of the 383,641 codeine prescriptions dispensed in 2016, 98.9% were for codeine/paracetamol combination products, of which 54.6% were for low-dose codeine products (codeine/paracetamol 8 mg/500 mg per tablet), 6.9% were for medium-dose codeine products (codeine/paracetamol 15 mg/500 mg per tablet), and 38.5% were for high-dose codeine products (codeine/paracetamol 30 mg/500 mg per tablet). Prochlorperazine and hyoscine butylbromide were the most commonly used medications with anticholinergic effects (5.9% and 4.6% of patients, respectively).

Figure 1 shows the frequency of DBI drug classes dispensed to Irish older people in 2016.

Anxiolytics/hypnotics and antidepressants were the most frequently prescribed drug classes of DBI medications (25% and 24% of DBI prescriptions dispensed in 2016, respectively). Of the 1,264,078 anxiolytic/hypnotic prescriptions dispensed in 2016, 52.5% were for benzodiazepines, and 47.4% were for Z-drugs (zopiclone, zolpidem and zaleplon). Of the 1,211,319 antidepressant prescriptions, 47.3% were for selective serotonin reuptake inhibitors, 16.8% were for tricyclic antidepressants, 16.7% were for serotonin noradrenaline reuptake inhibitors, and 19.2% were for other antidepressants (mirtazapine, phenelzine, and trazodone).

## Discussion

This study found that the majority of older people in Ireland are exposed to medications with anticholinergic and/or sedative effects, particularly females and those with multiple comorbidities. A lower prevalence of exposure to DBI medications of 43% was reported in a previous population study of older people living in New Zealand, of similar size and methodology to the current study.<sup>15</sup> Other studies of DBI exposure conducted in Australia, USA and Europe, with smaller cohorts of older people in various settings, have demonstrated a prevalence ranging from 20% up to 79%.<sup>20,21,35,36</sup> This variability may be related to different definitions used to identify anticholinergic and sedative medications, specific sociodemographic or health status characteristics of participants, and differences in medication access and use across different settings and countries.<sup>2</sup> Further, prevalence rates calculated for the current study included DBI medications dispensed on an 'as needed' basis. There is no consistency in terms of the inclusion or exclusion of 'as needed' medications in previous studies, which may also explain the variability in prevalence rates reported.

This current study found that female patients and patients with high comorbidity burdens, who are more likely to be very old (80+ years), all appear to be particularly vulnerable to exposure to DBI medications, which is consistent with the literature.<sup>15</sup> Numerous studies have reported greater use of psychotropic drugs and analgesics by women compared to men.<sup>37-40</sup> Possible reasons for a greater use amongst women include increased willingness to seek medical care, increased likelihood of women to

1  
2  
3  
4 perceive and report mental illness or pain, and general practitioner (GP) prescribing bias.<sup>41,42</sup> It has been  
5 shown that women are more likely to receive a prescription for a psychotropic drug during a GP  
6 consultation compared to men.<sup>37</sup> Targeted efforts to reduce inappropriate prescribing of these  
7 medications in vulnerable older women are therefore needed.  
8

9  
10 Examination of the most frequently used DBI medications (Table 2) suggests there may be opportunities  
11 for deprescribing of DBI medications in older Irish people. The high use of low-dose  
12 codeine/paracetamol combinations is of particular concern. It is known that codeine doses of at least 30  
13 mg are required for analgesia.<sup>43</sup> At this dose, a small but statistically significant increase in the analgesic  
14 effect of codeine/paracetamol combinations compared to paracetamol alone has been shown.<sup>43,44</sup>  
15 However, there is a lack of pharmacological evidence to support the analgesic benefit from using low-  
16 dose codeine combination analgesics.<sup>45</sup> Combining low-doses of codeine with paracetamol is likely to  
17 bring minimal analgesic benefit, but will increase the risk of adverse effects.<sup>46</sup> The most frequently  
18 prescribed codeine combination product in our study contained 8 mg of codeine and 500 mg of  
19 paracetamol per tablet. Thus, at the maximal dose of two tablets (16 mg/1000 mg  
20 codeine/paracetamol), the quantity of codeine would not achieve doses close to the minimum effective  
21 dose of codeine required for analgesia. Yet, these products will still induce the adverse effects  
22 experienced with codeine, including constipation, nausea, dry mouth, dizziness and drowsiness.<sup>47</sup>  
23 Further, the use of codeine in older people has been associated with an increased risk of falls and hip  
24 fracture (60% increased risk),<sup>48</sup> which highlights the need to limit its use.<sup>49</sup> Therefore, use of a  
25 paracetamol alone product, rather than a combined low-dose codeine/paracetamol product, may be  
26 more appropriate for some patients.  
27  
28  
29  
30  
31

32  
33 The high use of hypnotic Z-drugs and anxiolytic benzodiazepines (alprazolam and diazepam) is also  
34 noteworthy. Widespread use of benzodiazepines and Z-drugs has been reported in other European  
35 countries.<sup>50,51</sup> These drugs should be used with caution due to their adverse effect profile, such as  
36 drowsiness, confusion, impairment of memory, and incoordination, which can be particularly  
37 problematic in older people.<sup>52</sup> Both benzodiazepines and Z-drugs have been associated with problems in  
38 older people including an increased risk of injurious falls and hip fracture, and cognitive impairment.<sup>14,17</sup>  
39 It is therefore recommended that these drugs be avoided in older people and, where appropriate,  
40 discontinuation under appropriate supervision is widely advised.<sup>17,53</sup> It has been shown that  
41 discontinuation of benzodiazepines and Z-drugs in community-dwelling older people is possible, without  
42 adverse events attributable to discontinuation, and may be associated with improved health outcomes,  
43 such as a reduction in the risk of falls and improvements in cognitive functioning.<sup>16,54,55</sup> A meta-analysis  
44 of interventions to reduce benzodiazepine and Z-drug use in older people demonstrated the beneficial  
45 effects of consultations and education of both prescribers and patients, followed by a supervised  
46 withdrawal.<sup>56</sup>  
47  
48  
49  
50

### 51 ***Strengths and limitations***

52  
53  
54 The present study was a large national study of DBI exposure in community-dwelling older patients in  
55 Ireland. The study design enabled examination of the variation in DBI exposure between patients in a  
56  
57  
58  
59

1  
2  
3  
4 highly representative population. A consensus list of DBI medications was developed, which may be of  
5 use for future studies using the DBI tool.  
6

7  
8 The authors acknowledge the following limitations. These largely result from the constraints of using  
9 pharmacy claims data in this study. Information about the clinical indication for prescriptions is not  
10 available in pharmacy claims data and therefore it is not possible to assess the appropriateness of DBI  
11 prescriptions. DBI prescribing may not always be inappropriate. The prescription may be justified for  
12 clinical reasons, after balancing risk and benefit in conditions of uncertainty. Nevertheless, given that  
13 DBI medications have been associated with adverse events in older people, the observed high  
14 prevalence of DBI prescribing suggests that a significant amount of prescribing could be improved. In  
15 addition, pharmacy claims data does not include medications purchased over-the-counter (OTC).  
16 However, there is no incentive for GMS patients to buy medications OTC, as most of these items are  
17 available on prescription for a small co-payment, and therefore the risk of bias is expected to be low. All  
18 medications dispensed were included in the analyses but it was not possible to confirm whether the  
19 dispensed medications were consumed and for how long. Therefore, the DBI calculations may not  
20 reflect true exposure. However, the results reflect prescribing practice in terms of intention to prescribe.  
21 There is also the possibility of socioeconomic bias, particularly in the 65-69 year age group, as only 40%  
22 of this population is covered under the GMS scheme, which over represents more socially deprived  
23 individuals. However, approximately 80% of those aged  $\geq 70$  years are covered for medications under the  
24 GMS scheme and, therefore, socioeconomic bias in these patients would be low. Another notable  
25 limitation involves the list of DBI medications used in this analysis, which, although determined by  
26 consensus, may be associated with interpretation bias leading to an over- or under-estimation of the  
27 prevalence of DBI exposure. There is no gold standard definition to describe medications with clinically  
28 significant anticholinergic or sedative effects and therefore the clinical validity of our selection of drugs  
29 may be limited by this.  
30  
31  
32  
33  
34  
35

### 36 ***Implications for policy and practice***

37  
38  
39 The results of this present study highlight the need for interventions to reduce the inappropriate use of  
40 medications with clinically significant anticholinergic or sedative effects in older people in Ireland. In  
41 particular, the high use of low-dose codeine/paracetamol combination products, Z-drugs and  
42 benzodiazepines, suggests that interventions to alert prescribers and patients about the risks associated  
43 with these drugs in older people should be a priority. Due consideration should also be given to the  
44 importance of regular medication reviews, with a particular focus on older females and those with  
45 multiple comorbidities.  
46  
47

48  
49 In practice, the DBI may be useful as a screening tool for older patients, to identify those patients with  
50 high exposure, which may compromise their physical and cognitive functioning.<sup>57</sup> Such patients are likely  
51 to be eligible for deprescribing interventions such as medication review.<sup>57</sup> A previous intervention study  
52 showed that collaborative pharmacist-led medication review with the GP can reduce the prescribing of  
53 sedative and anticholinergic medications in older people, resulting in a significant decrease in the DBI  
54  
55  
56  
57  
58  
59

1  
2  
3  
4 score.<sup>58</sup> At the population level, the DBI tool could be used as a quality indicator to guide policy to  
5 improve prescribing and optimise clinical outcomes in older people.<sup>15</sup>  
6

### 7 **Conclusions**

8  
9 In conclusion, this large population-based study has shown that there is a high prevalence of use of  
10 medications with anticholinergic and sedative effects among Irish community-dwelling older people,  
11 particularly in females and those with multiple comorbidities. The high use of low-dose  
12 codeine/paracetamol combination products, Z-drugs and benzodiazepines, suggests that there are  
13 opportunities for deprescribing in this population. The consensus list of DBI medications developed may  
14 be of use in future studies using the DBI tool. Future research should focus on examining the impact of  
15 DBI on important health outcomes in older Irish patients, and developing interventions to reduce the  
16 inappropriate use of DBI medications in this vulnerable patient population.  
17  
18  
19  
20

### 21 **Acknowledgements**

22  
23 We thank the HSE-PCRS for supplying the data on which the study was based. Funding from the Health  
24 Research Board in Ireland (RL-2015-1579) supported the research.  
25  
26

### 27 **Footnotes**

28  
29 **Contributors:** CB and KB conceived and designed the study. CB, CW, DW and CR contributed to  
30 development of the DBI medication list. KB accessed the data (HSE-PCRS). KB and CB performed the  
31 analysis and interpreted the results. CB wrote the manuscript. All authors critically revised the  
32 manuscript and approved the final version.  
33  
34

35  
36 **Funding:** This work was supported by the Health Research Board in Ireland (grant code RL-2015-1579).  
37 The funder had no role in the conduct of the study.  
38

39 **Competing interests:** None declared.  
40

41 **Patient consent:** Not required.  
42

43  
44 **Ethical approval:** The anonymised data in this study were exempt from review by an institutional review  
45 board.  
46

47 **Provenance and peer review:** Not commissioned; externally peer reviewed.  
48

49  
50 **Data sharing statement:** No additional data available.  
51  
52  
53  
54  
55  
56  
57  
58  
59  
60

## References

1. Sumukadas D, McMurdo ME, Mangoni AA, *et al.* Temporal trends in anticholinergic medication prescription in older people: repeated cross-sectional analysis of population prescribing data. *Age Ageing* 2014; **43**:515-521.
2. Kouladjian L, Gnjjidic D, Chen TF, *et al.* Drug Burden Index in older adults: theoretical and practical issues. *Clin Interv Aging* 2014; **9**:1503-1515.
3. Han L, Agostini JV, Allore HG. Cumulative anticholinergic exposure is associated with poor memory and executive function in older men. *J Am Geriatr Soc* 2008; **56**:2203-2210.
4. Fox C, Richardson K, Maidment ID, *et al.* Anticholinergic medication use and cognitive impairment in the older population: the medical research council cognitive function and ageing study. *J Am Geriatr Soc* 2011; **59**:1477-1483.
5. Taipale HT, Hartikainen S, Bell JS. A comparison of four methods to quantify the cumulative effect of taking multiple drugs with sedative properties. *Am J Geriatr Pharmacother* 2010; **8**:460-471.
6. Cutson TM, Gray SL, Hughes MA, *et al.* Effect of a single dose of diazepam on balance measures in older people. *J Am Geriatr Soc* 1997; **45**:435-440.
7. Gnjjidic D, Cumming RG, Le Couteur DG, *et al.* Drug Burden Index and physical function in older Australian men. *Br J Clin Pharmacol* 2009; **68**:97-105.
8. Tinetti ME, Speechley M, Ginter SF. Risk factors for falls among elderly persons living in the community. *N Engl J Med* 1988; **319**:1701-1707.
9. Landi F, Onder G, Cesari M, *et al.* Psychotropic medications and risk for falls among community-dwelling frail older people: an observational study. *J Gerontol A Biol Sci Med Sci* 2005; **60**:622-626.
10. Landi F, Russo A, Liperoti R, *et al.* Anticholinergic drugs and physical function among frail elderly population. *Clin Pharmacol Ther* 2007; **81**:235-241.
11. Gray SL, LaCroix AZ, Hanlon JT, *et al.* Benzodiazepine use and physical disability in community-dwelling older adults. *J Am Geriatr Soc* 2006; **54**:224-230.
12. Carriere I, Fourrier-Reglat A, Dartigues JF, *et al.* Drugs with anticholinergic properties, cognitive decline, and dementia in an elderly general population: the 3-city study. *Arch Intern Med* 2009; **169**:1317-1324.
13. Hanlon JT, Horner RD, Schmader KE, *et al.* Benzodiazepine use and cognitive function among community-dwelling elderly. *Clin Pharmacol Ther* 1998; **64**:684-692.
14. Glass J, Lanctot KL, Herrmann N, *et al.* Sedative hypnotics in older people with insomnia: meta-analysis of risks and benefits. *Bmj* 2005; **331**:1169.
15. Nishtala PS, Narayan SW, Wang T, *et al.* Associations of drug burden index with falls, general practitioner visits, and mortality in older people. *Pharmacoepidemiol Drug Saf* 2014; **23**:753-758.
16. Campbell AJ, Robertson MC, Gardner MM, *et al.* Psychotropic medication withdrawal and a home-based exercise program to prevent falls: a randomized, controlled trial. *J Am Geriatr Soc* 1999; **47**:850-853.
17. Cumming RG, Le Couteur DG. Benzodiazepines and risk of hip fractures in older people: a review of the evidence. *CNS Drugs* 2003; **17**:825-837.
18. Garfinkel D, Mangin D. Feasibility study of a systematic approach for discontinuation of multiple medications in older adults: addressing polypharmacy. *Arch Intern Med* 2010; **170**:1648-1654.
19. Hilmer SN, Mager DE, Simonsick EM, *et al.* A drug burden index to define the functional burden of medications in older people. *Arch Intern Med* 2007; **167**:781-787.
20. Hilmer SN, Mager DE, Simonsick EM, *et al.* Drug burden index score and functional decline in older people. *Am J Med* 2009; **122**:1142-1149.

21. Gnjjidic D, Hilmer SN, Blyth FM, *et al.* High-risk prescribing and incidence of frailty among older community-dwelling men. *Clin Pharmacol Ther* 2012; **91**:521-528.
22. Wilson NM, Hilmer SN, March LM, *et al.* Associations between drug burden index and falls in older people in residential aged care. *J Am Geriatr Soc* 2011; **59**:875-880.
23. Gnjjidic D, Hilmer SN, Hartikainen S, *et al.* Impact of high risk drug use on hospitalization and mortality in older people with and without Alzheimer's disease: a national population cohort study. *PLoS One* 2014; **9**:e83224.
24. Health Service Executive. Primary Care Reimbursement Service: Statistical Analysis of Claims and Payments 2015. Dublin, Ireland: Health Service Executive, 2015.
25. Central Statistics Office. Census of Population 2016 - Profile 3 An Age Profile of Ireland. <http://www.cso.ie/en/statistics/> (Accessed 1 December 2017).
26. WHO Collaborating Centre for Drug Statistics Methodology, ATC/DDD Index 2017. [https://www.whocc.no/atc\\_ddd\\_index/](https://www.whocc.no/atc_ddd_index/) (Accessed July to October 2017).
27. Medicines.ie. Medicines information online - Summary of Product Characteristics. <http://www.medicines.ie/> (Accessed July to October 2017).
28. Medicines.org.uk. Electronic Medicines Compendium (eMC). <http://www.medicines.org.uk/emc/> (Accessed July to October 2017).
29. Medicines Complete. British National Formulary (BNF) 2017. <https://www.medicinescomplete.com/mc/bnf/current/search.htm?q=bnf> (Accessed July to October 2017).
30. Medicines Complete. Martindale: The Complete Drug Reference 2017. <https://www.medicinescomplete.com/mc/martindale/> (Accessed July to October 2017).
31. Semla TP, Beizer JL, Higbee MD. Geriatric dosage handbook: Including clinical recommendations and monitoring guidelines (21st Edition). Hudson, Ohio: Lexicomp; 2016.
32. Ailabouni N, Mangin D, Nishtala PS. Deprescribing anticholinergic and sedative medicines: protocol for a Feasibility Trial (DEFEAT-polypharmacy) in residential aged care facilities. *BMJ Open* 2017; **7**:e013800.
33. Cahir C, Fahey T, Teeling M, *et al.* Potentially inappropriate prescribing and cost outcomes for older people: a national population study. *Br J Clin Pharmacol* 2010; **69**:543-552.
34. Byrne CJ, Cahir C, Curran C, *et al.* High-risk prescribing in an Irish primary care population: trends and variation. *Br J Clin Pharmacol* 2017; **83**:2821-2830.
35. Bosboom PR, Alfonso H, Almeida OP, *et al.* Use of Potentially Harmful Medications and Health-Related Quality of Life among People with Dementia Living in Residential Aged Care Facilities. *Dement Geriatr Cogn Dis Extra* 2012; **2**:361-371.
36. Gnjjidic D, Bell JS, Hilmer SN, *et al.* Drug Burden Index associated with function in community-dwelling older people in Finland: a cross-sectional study. *Ann Med* 2012; **44**:458-467.
37. Simoni-Wastila L. Gender and psychotropic drug use. *Med Care* 1998; **36**:88-94.
38. Tu K, Mamdani MM, Hux JE, *et al.* Progressive trends in the prevalence of benzodiazepine prescribing in older people in Ontario, Canada. *J Am Geriatr Soc* 2001; **49**:1341-1345.
39. Goulding MR. Inappropriate medication prescribing for elderly ambulatory care patients. *Arch Intern Med* 2004; **164**:305-312.
40. Bierman AS, Pugh MJ, Dhalla I, *et al.* Sex differences in inappropriate prescribing among elderly veterans. *Am J Geriatr Pharmacother* 2007; **5**:147-161.
41. Cafferata GL, Meyers SM. Pathways to psychotropic drugs. Understanding the basis of gender differences. *Med Care* 1990; **28**:285-300.
42. van der Waals FW, Mohrs J, Foets M. Sex differences among recipients of benzodiazepines in Dutch general practice. *Bmj* 1993; **307**:363-366.

- 1
- 2
- 3
- 4 43. Shaheed CA, Maher CG, McLachlan AJ. Investigating the efficacy and safety of over-the-counter
- 5 codeine combination analgesics for pain and codeine based antitussives. Woden, Australia: Government
- 6 of Australia, Department of Health, Therapeutic Goods Administration, 2016.
- 7 44. de Craen AJ, Di Giulio G, Lampe-Schoenmaeckers JE, *et al.* Analgesic efficacy and safety of
- 8 paracetamol-codeine combinations versus paracetamol alone: a systematic review. *Bmj* 1996; **313**:321-
- 9 325.
- 10 45. Robinson GM, Robinson S, McCarthy P, *et al.* Misuse of over-the-counter codeine-containing
- 11 analgesics: dependence and other adverse effects. *N Z Med J* 2010; **123**:59-64.
- 12 46. Ferner RE, Beard K. Over the counter medicines: proceed with caution. *Bmj* 2008; **336**:694-696.
- 13 47. Moore RA, McQuay HJ. Prevalence of opioid adverse events in chronic non-malignant pain:
- 14 systematic review of randomised trials of oral opioids. *Arthritis Res Ther* 2005; **7**:R1046-1051.
- 15 48. Shorr RI, Griffin MR, Daugherty JR, *et al.* Opioid analgesics and the risk of hip fracture in the elderly:
- 16 codeine and propoxyphene. *J Gerontol* 1992; **47**:M111-115.
- 17 49. McLachlan AJ, Bath S, Naganathan V, *et al.* Clinical pharmacology of analgesic medicines in older
- 18 people: impact of frailty and cognitive impairment. *Br J Clin Pharmacol* 2011; **71**:351-364.
- 19 50. Huerta C, Abbing-Karahagopian V, Requena G, *et al.* Exposure to benzodiazepines (anxiolytics,
- 20 hypnotics and related drugs) in seven European electronic healthcare databases: a cross-national
- 21 descriptive study from the PROTECT-EU Project. *Pharmacoepidemiol Drug Saf* 2016; **25 Suppl 1**:56-65.
- 22 51. Benard-Laribiere A, Noize P, Pambrun E, *et al.* Trends in incident use of benzodiazepines and Z-drugs
- 23 in France from 2006 to 2012: a population-based study. *Pharmacoepidemiol Drug Saf* 2017; **26**:162-169.
- 24 52. Davidson JR, Zhang W, Connor KM, *et al.* A psychopharmacological treatment algorithm for
- 25 generalised anxiety disorder (GAD). *J Psychopharmacol* 2010; **24**:3-26.
- 26 53. Bourgeois J, Elseviers MM, Van Bortel L, *et al.* Feasibility of discontinuing chronic benzodiazepine use
- 27 in nursing home residents: a pilot study. *Eur J Clin Pharmacol* 2014; **70**:1251-1260.
- 28 54. Curran HV, Collins R, Fletcher S, *et al.* Older adults and withdrawal from benzodiazepine hypnotics in
- 29 general practice: effects on cognitive function, sleep, mood and quality of life. *Psychol Med* 2003;
- 30 **33**:1223-1237.
- 31 55. Tsunoda K, Uchida H, Suzuki T, *et al.* Effects of discontinuing benzodiazepine-derivative hypnotics on
- 32 postural sway and cognitive functions in the elderly. *Int J Geriatr Psychiatry* 2010; **25**:1259-1265.
- 33 56. Gould RL, Coulson MC, Patel N, *et al.* Interventions for reducing benzodiazepine use in older people:
- 34 meta-analysis of randomised controlled trials. *Br J Psychiatry* 2014; **204**:98-107.
- 35 57. Wouters H, van der Meer H, Taxis K. Quantification of anticholinergic and sedative drug load with the
- 36 Drug Burden Index: a review of outcomes and methodological quality of studies. *Eur J Clin Pharmacol*
- 37 2017; **73**:257-266.
- 38 58. Nishtala PS, Hilmer SN, McLachlan AJ, *et al.* Impact of residential medication management reviews on
- 39 drug burden index in aged-care homes: a retrospective analysis. *Drugs Aging* 2009; **26**:677-686.
- 40
- 41
- 42
- 43
- 44
- 45
- 46
- 47
- 48
- 49
- 50
- 51
- 52
- 53
- 54
- 55
- 56
- 57
- 58
- 59



**Table 1.** Prevalence of patients aged 65 years and over dispensed at least one Drug Burden Index medication prescription in 2016

| Patient level fixed effects ( <i>n</i> ) | % dispensed a DBI prescription | Odds ratio (95% CI) |                     |
|------------------------------------------|--------------------------------|---------------------|---------------------|
|                                          |                                | Unadjusted          | Adjusted            |
| <b>Sex:</b>                              |                                |                     |                     |
| Male (185938)                            | 58.7                           | 1.00                | 1.00                |
| Female (242578)                          | 71.6                           | 1.78 (1.75-1.80)    | 1.65 (1.63-1.68)    |
| <b>Number of chronic drugs:</b>          |                                |                     |                     |
| 0-4 (153960)                             | 42.7                           | 1.00                | 1.00                |
| 5-7 (113614)                             | 66.4                           | 2.65 (2.60-2.69)    | 2.67 (2.63-2.71)    |
| 8-11 (102682)                            | 83.9                           | 6.96 (6.82-7.09)    | 7.03 (6.89-7.17)    |
| ≥12 (58260)                              | 95.4                           | 27.63 (26.55-28.76) | 27.81 (26.72-28.96) |
| <b>Age (years):</b>                      |                                |                     |                     |
| 65-69 (96804)                            | 63.5                           | 1.00                | 1.00                |
| 70-74 (109118)                           | 62.4                           | 0.95 (0.94-0.97)    | 0.85 (0.83-0.87)    |
| 75-79 (93300)                            | 65.3                           | 1.09 (1.07-1.11)    | 0.81 (0.80-0.83)    |
| ≥80 (129294)                             | 71.5                           | 1.44 (1.42-1.47)    | 0.82 (0.81-0.84)    |

*n*, number of patients; DBI, Drug Burden Index; CI, confidence interval

**Table 2.** Most frequently used Drug Burden Index medications in Irish older people in 2016<sup>a</sup>

| Medication       | Anticholinergic/sedative effects | % patients |
|------------------|----------------------------------|------------|
| Codeine          | Sedative                         | 20.1       |
| Tramadol         | Sedative                         | 11.5       |
| Zopiclone        | Sedative                         | 9.5        |
| Zolpidem         | Sedative                         | 8.5        |
| Pregabalin       | Sedative                         | 7.9        |
| Alprazolam       | Sedative                         | 7.8        |
| Diazepam         | Sedative                         | 6.5        |
| Escitalopram     | Sedative                         | 5.9        |
| Prochlorperazine | Anticholinergic + Sedative       | 5.9        |
| Mirtazapine      | Sedative                         | 4.8        |

<sup>a</sup>Prevalence calculated by the number of patients dispensed at least one prescription for a Drug Burden Index medication divided by the total number of patients dispensed at least one prescription in 2016.

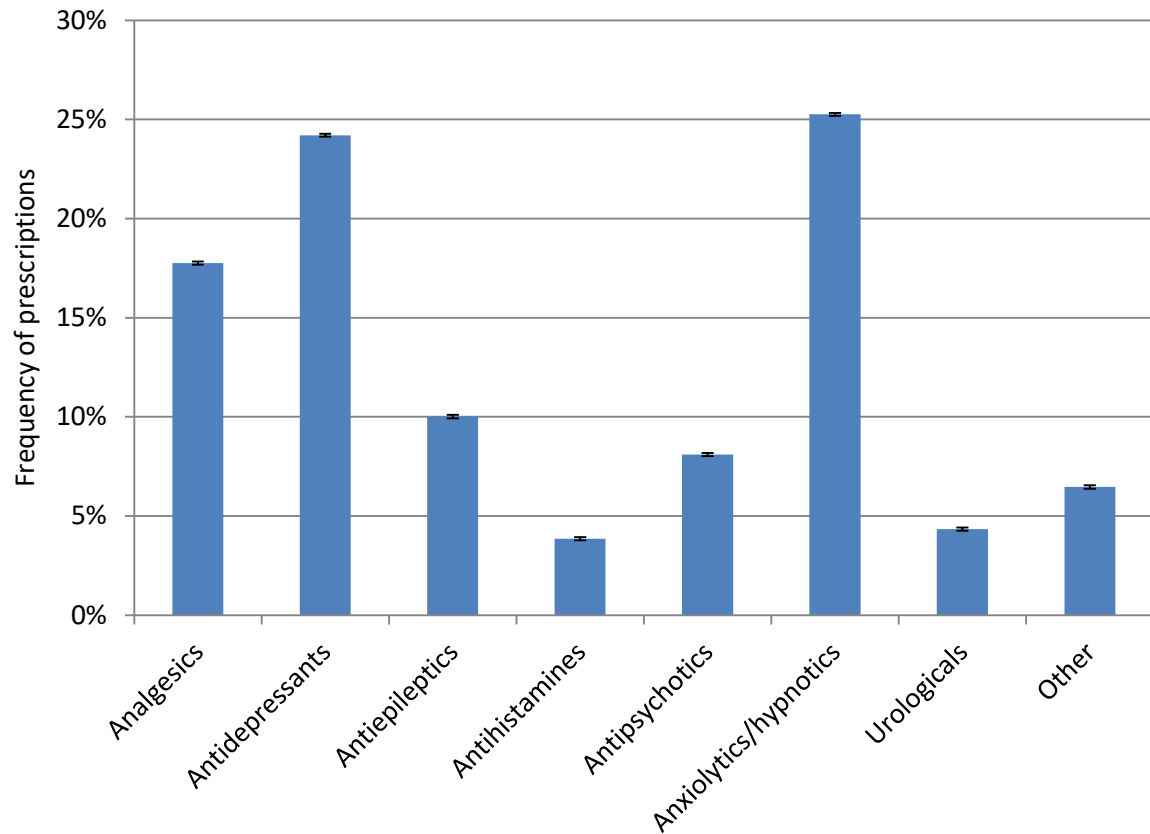

**Figure 1.** Percentage and 95% confidence intervals of anticholinergic and/or sedative medication prescriptions dispensed by drug class in Irish older patients in 2016. Other=antiparkinson drugs, cardiovascular drugs, gastrointestinal drugs, and muscle relaxants.

**Supplementary Table S1.** Medications with anticholinergic and/or sedatives effects for inclusion in the calculation of Drug Burden Index

| Drug             | WHO ATC Code/s     | Anticholinergic effects (AC) | Sedative effects (S) | Minimum effective daily dose by route of administration (mg) |            |                   |             |        |            |
|------------------|--------------------|------------------------------|----------------------|--------------------------------------------------------------|------------|-------------------|-------------|--------|------------|
|                  |                    |                              |                      | Oral                                                         | Parenteral | Sublingual/buccal | Transdermal | Rectal | Inhalation |
| Alimemazine      | R06AD01            | AC                           | S                    | 10                                                           |            |                   |             |        |            |
| Alprazolam       | N05BA12            |                              | S                    | 0.5                                                          |            |                   |             |        |            |
| Amantadine       | N04BB01            | AC                           |                      | 100                                                          |            |                   |             |        |            |
| Amisulpride      | N05AL05            |                              | S                    | 50                                                           |            |                   |             |        |            |
| Amitriptyline    | N06AA09            | AC                           | S                    | 10                                                           |            |                   |             |        |            |
| Aripiprazole     | N05AX12            |                              | S                    | 10                                                           | 10         |                   |             |        |            |
| Asenapine        | N05AH05            |                              | S                    |                                                              |            | 10                |             |        |            |
| Atropine         | A03BA01<br>A03CB03 | AC                           |                      | 0.6                                                          | 0.3        |                   |             |        |            |
| Baclofen         | M03BX01            |                              | S                    | 30                                                           | 30         |                   |             |        |            |
| Benperidol       | N05AD07            |                              | S                    | 0.125                                                        |            |                   |             |        |            |
| Benzatropine     | N04AC01            | AC                           |                      | 0.5                                                          | 0.5        |                   |             |        |            |
| Biperiden        | N04AA02            | AC                           | S                    | 1                                                            |            |                   |             |        |            |
| Brompheniramine  | R06AB01<br>R06AB51 | AC                           | S                    | 16                                                           |            |                   |             |        |            |
| Bucizine         | R06AE51<br>R06AE01 | AC                           | S                    | 12.5                                                         |            |                   |             |        |            |
| Buprenorphine    | N02AE01            |                              | S                    |                                                              | 0.12       | 0.4               | 0.12        |        |            |
| Buspirone        | N05BE01            |                              | S                    | 15                                                           |            |                   |             |        |            |
| Carbamazepine    | N03AF01            | AC                           | S                    | 400                                                          |            |                   |             | 500    |            |
| Cetirizine       | R06AE07            |                              | S                    | 10                                                           |            |                   |             |        |            |
| Cloral Hydrate   | N05CC01            |                              | S                    | 430                                                          |            |                   |             |        |            |
| Chlordiazepoxide | N05BA02            |                              | S                    | 5                                                            |            |                   |             |        |            |
| Chlorphenamine   | R06AB04            | AC                           | S                    | 8                                                            | 3          |                   |             |        |            |
| Chlorpromazine   | N05AA01            | AC                           | S                    | 30                                                           | 6          |                   |             |        |            |
| Cinnarizine      | N07CA02            | AC                           | S                    | 60                                                           |            |                   |             |        |            |

|                     |         |    |   |     |     |  |  |   |  |
|---------------------|---------|----|---|-----|-----|--|--|---|--|
|                     | N07CA52 |    |   |     |     |  |  |   |  |
| Citalopram          | N06AB04 |    | S | 10  |     |  |  |   |  |
| Clemastine          | R06AA04 | AC | S | 2   |     |  |  |   |  |
|                     | R06AA54 |    |   |     |     |  |  |   |  |
| Clobazam            | N05BA09 |    | S | 10  |     |  |  |   |  |
| Clomethiazole       | N05CM0  |    | S | 192 |     |  |  |   |  |
|                     | N05CX04 |    |   |     |     |  |  |   |  |
| Clomipramine        | N06AA04 | AC | S | 30  |     |  |  |   |  |
| Clonazepam          | N03AE01 |    | S | 0.5 | 0.5 |  |  |   |  |
| Clonidine           | N02CX02 |    | S | 0.1 |     |  |  |   |  |
|                     | C02AC01 |    |   |     |     |  |  |   |  |
| Clozapine           | N05AH02 | AC | S | 25  |     |  |  |   |  |
| Codeine             | R05DA04 |    | S | 120 |     |  |  |   |  |
|                     | N02AJ06 |    |   |     |     |  |  |   |  |
| Cyclizine           | R06AE03 | AC | S | 50  | 50  |  |  |   |  |
|                     | N02AA51 |    |   |     |     |  |  |   |  |
| Cyproheptadine      | R06AX02 | AC | S | 4   |     |  |  |   |  |
| Darifenacin         | G04BD10 | AC |   | 7.5 |     |  |  |   |  |
| Dexchlorpheniramine | R06AB02 | AC | S | 8   |     |  |  |   |  |
|                     | R06AB52 |    |   |     |     |  |  |   |  |
| Diazepam            | N05BA01 |    | S | 1   | 1   |  |  | 1 |  |
| Dicycloverine       | A03AA07 | AC |   | 30  |     |  |  |   |  |
| Dihydrocodeine      | N02AA08 |    | S | 40  |     |  |  |   |  |
|                     | N02AJ01 |    |   |     |     |  |  |   |  |
| Dimenhydrinate      | R06AA02 | AC | S | 150 |     |  |  |   |  |
|                     | N07CA52 |    |   |     |     |  |  |   |  |
| Diphenhydramine     | N02BE71 | AC | S | 50  |     |  |  |   |  |
|                     | N02BE51 |    |   |     |     |  |  |   |  |
|                     | R06AA02 |    |   |     |     |  |  |   |  |
|                     | R06AA52 |    |   |     |     |  |  |   |  |
| Diphenoxylate       | A07DA01 |    | S | 5   |     |  |  |   |  |

|    |                       |         |    |   |       |      |     |     |  |
|----|-----------------------|---------|----|---|-------|------|-----|-----|--|
| 1  |                       |         |    |   |       |      |     |     |  |
| 2  |                       |         |    |   |       |      |     |     |  |
| 3  | Disopyramide          | C01BA03 | AC |   | 300   | 300  |     |     |  |
| 4  | Dosulepin             | N06AA16 | AC | S | 50    |      |     |     |  |
| 5  | Doxazosin             | C02CA04 |    | S | 2     |      |     |     |  |
| 6  | Doxepin               | N06AA12 | AC | S | 25    |      |     |     |  |
| 7  | Doxylamine            | R06AA09 | AC | S | 25    |      |     |     |  |
| 8  |                       | R06AA59 |    |   |       |      |     |     |  |
| 9  |                       | N02BE51 |    |   |       |      |     |     |  |
| 10 | Duloxetine            | N06AX21 |    | S | 30    |      |     |     |  |
| 11 | Escitalopram          | N06AB10 |    | S | 5     |      |     |     |  |
| 12 | Fentanyl              | N02AB03 |    | S |       | 0.3  | 0.6 | 0.3 |  |
| 13 | Fesoterodine          | G04BD11 | AC |   | 4     |      |     |     |  |
| 14 | Fexofenadine          | R06AX26 |    | S | 120   |      |     |     |  |
| 15 | Flavoxate             | G04BD02 | AC | S | 600   |      |     |     |  |
| 16 | Flunitrazepam         | N05CD03 |    | S | 0.5   |      |     |     |  |
| 17 | Fluoxetine            | N06AB03 |    | S | 20    |      |     |     |  |
| 18 | Flupentixol           | N05AF01 | AC | S | 0.5   | 0.3  |     |     |  |
| 19 | Fluphenazine          | N05AB02 | AC | S |       | 0.36 |     |     |  |
| 20 | Flurazepam            | N05CD01 |    | S | 15    |      |     |     |  |
| 21 | Fluvoxamine           | N06AB08 |    | S | 100   |      |     |     |  |
| 22 | Gabapentin            | N03AX12 |    | S | 900   |      |     |     |  |
| 23 | Glycopyrronium        | A03AB02 | AC | S | 2     | 0.2  |     |     |  |
| 24 | Haloperidol           | N05AD01 |    | S | 0.5   | 0.25 |     |     |  |
| 25 | Hydromorphone         | N02AA03 |    | S | 7.8   | 2.6  |     |     |  |
| 26 | Hydroxyzine           | N05BB01 | AC | S | 25    |      |     |     |  |
| 27 | Hyoscine base         | A04AD01 | AC | S |       |      |     | 0.5 |  |
| 28 | Hyoscine Butylbromide | A03BB01 | AC |   | 30    | 30   |     |     |  |
| 29 | Hyoscine Hydrobromide | A04AD01 | AC | S | 0.9   |      |     | 0.5 |  |
| 30 | Hyoscyamine           | A03CB31 | AC |   | 0.375 |      |     |     |  |
| 31 |                       | A03BA03 |    |   |       |      |     |     |  |
| 32 |                       |         |    |   |       |      |     |     |  |
| 33 |                       |         |    |   |       |      |     |     |  |
| 34 |                       |         |    |   |       |      |     |     |  |
| 35 |                       |         |    |   |       |      |     |     |  |
| 36 |                       |         |    |   |       |      |     |     |  |
| 37 |                       |         |    |   |       |      |     |     |  |
| 38 |                       |         |    |   |       |      |     |     |  |
| 39 |                       |         |    |   |       |      |     |     |  |
| 40 |                       |         |    |   |       |      |     |     |  |
| 41 |                       |         |    |   |       |      |     |     |  |
| 42 |                       |         |    |   |       |      |     |     |  |
| 43 |                       |         |    |   |       |      |     |     |  |
| 44 |                       |         |    |   |       |      |     |     |  |
| 45 |                       |         |    |   |       |      |     |     |  |
| 46 |                       |         |    |   |       |      |     |     |  |

|    |                 |         |    |   |      |      |  |  |     |
|----|-----------------|---------|----|---|------|------|--|--|-----|
| 1  |                 |         |    |   |      |      |  |  |     |
| 2  |                 |         |    |   |      |      |  |  |     |
| 3  | Imipramine      | N06AA02 | AC | S | 30   |      |  |  |     |
| 4  | Indoramin       | C02CA02 |    | S | 20   |      |  |  |     |
| 5  |                 |         |    |   |      |      |  |  |     |
| 6  | Lamotrigine     | N03AX09 |    | S | 100  |      |  |  |     |
| 7  |                 |         |    |   | 200* |      |  |  |     |
| 8  | Levetiracetam   | N03AX14 |    | S | 1000 |      |  |  |     |
| 9  | Levocetirizine  | R06AE09 |    | S | 5    |      |  |  |     |
| 10 |                 |         |    |   |      |      |  |  |     |
| 11 | Levomepromazine | N05AA02 | AC | S | 37.5 | 37.5 |  |  |     |
| 12 | Lofepramine     | N06AA07 | AC | S | 140  |      |  |  |     |
| 13 | Loprazolam      | N05CD11 |    | S | 1    |      |  |  |     |
| 14 | Loratadine      | R06AX13 |    | S | 10   |      |  |  |     |
| 15 | Lorazepam       | N05BA06 |    | S | 0.5  | 0.5  |  |  |     |
| 16 | Lormetazepam    | N05CD06 |    | S | 0.5  |      |  |  |     |
| 17 |                 |         |    |   |      |      |  |  |     |
| 18 | Loxapine        | N05AH01 | AC | S |      |      |  |  | 4.5 |
| 19 | Meclozine       | R06AE05 | AC | S | 25   |      |  |  |     |
| 20 |                 | R06AE55 |    |   |      |      |  |  |     |
| 21 |                 |         |    |   |      |      |  |  |     |
| 22 | Memantine       | N06DX01 |    | S | 20   |      |  |  |     |
| 23 | Meptazinol      | N02AX05 |    | S | 800  |      |  |  |     |
| 24 | Methadone       | N07BC02 |    | S | 5    |      |  |  |     |
| 25 |                 |         |    |   |      |      |  |  |     |
| 26 | Methocarbamol   | M03BA03 | AC | S | 2250 |      |  |  |     |
| 27 | Methyldopa      | C02AB01 |    | S | 500  |      |  |  |     |
| 28 | Metoclopramide  | A03FA01 |    | S | 15   | 15   |  |  |     |
| 29 |                 | N02BE51 |    |   |      |      |  |  |     |
| 30 |                 |         |    |   |      |      |  |  |     |
| 31 | Mianserin       | N06AX03 |    | S | 30   |      |  |  |     |
| 32 | Mirtazepine     | N06AX11 |    | S | 15   |      |  |  |     |
| 33 |                 |         |    |   |      |      |  |  |     |
| 34 | Morphine        | N02AA01 |    | S | 20   | 6.7  |  |  |     |
| 35 |                 | N02AA51 |    |   |      |      |  |  |     |
| 36 | Moxonidine      | C02AC05 |    | S | 0.2  |      |  |  |     |
| 37 | Nefopam         | N02BG06 | AC | S | 90   |      |  |  |     |
| 38 | Nitrazepam      | N05CD02 |    | S | 2.5  |      |  |  |     |
| 39 |                 |         |    |   |      |      |  |  |     |
| 40 | Nortriptyline   | N06AA10 | AC | S | 30   |      |  |  |     |
| 41 |                 |         |    |   |      |      |  |  |     |
| 42 |                 |         |    |   |      |      |  |  |     |
| 43 |                 |         |    |   |      |      |  |  |     |
| 44 |                 |         |    |   |      |      |  |  |     |
| 45 |                 |         |    |   |      |      |  |  |     |
| 46 |                 |         |    |   |      |      |  |  |     |

|    |                  |         |    |   |       |      |   |      |    |  |
|----|------------------|---------|----|---|-------|------|---|------|----|--|
| 1  |                  |         |    |   |       |      |   |      |    |  |
| 2  |                  |         |    |   |       |      |   |      |    |  |
| 3  | Olanzapine       | N05AH03 | AC | S | 5     | 5    |   |      |    |  |
| 4  | Orphenadrine     | N04AB02 | AC |   | 100   |      |   |      |    |  |
| 5  |                  |         |    |   |       |      |   |      |    |  |
| 6  | Oxazepam         | N05BA04 |    | S | 15    |      |   |      |    |  |
| 7  | Oxcarbazepine    | N03AF02 |    | S | 600   |      |   |      |    |  |
| 8  | Oxybutynin       | G04BD04 | AC | S | 5     |      |   | 1.95 |    |  |
| 9  |                  |         |    |   |       |      |   |      |    |  |
| 10 | Oxycodone        | N02AA05 |    | S | 20    | 10   |   |      | 20 |  |
| 11 |                  | N02AA55 |    |   |       |      |   |      |    |  |
| 12 | Paliperidone     | N05AX13 |    | S | 3     | 0.89 |   |      |    |  |
| 13 | Paroxetine       | N06AB05 | AC | S | 20    |      |   |      |    |  |
| 14 |                  |         |    |   |       |      |   |      |    |  |
| 15 | Pentazocine      | N02AD01 |    | S | 300   | 180  |   |      |    |  |
| 16 | Perampanel       | N03AX22 |    | S | 4     |      |   |      |    |  |
| 17 | Pericyazine      | N05AC01 | AC | S | 5     |      |   |      |    |  |
| 18 | Perphenazine     | N05AB03 | AC | S | 3     |      |   |      |    |  |
| 19 |                  |         |    |   |       |      |   |      |    |  |
| 20 | Pethidine        | N02AB02 |    | S | 300   | 150  |   |      |    |  |
| 21 | Phenelzine       | N06AF03 |    | S | 7.5   |      |   |      |    |  |
| 22 | Phenobarbital    | N03AA02 |    | S | 60    | 60   |   |      |    |  |
| 23 |                  |         |    |   |       |      |   |      |    |  |
| 24 | Phenytoin        | N03AB02 |    | S | 200   | 200  |   |      |    |  |
| 25 | Pimozide         | N05AG02 | AC | S | 2     |      |   |      |    |  |
| 26 | Pizotifen        | N02CX01 | AC | S | 1.5   |      |   |      |    |  |
| 27 |                  |         |    |   |       |      |   |      |    |  |
| 28 | Pramipexole      | N04BC05 |    | S | 0.088 |      |   |      |    |  |
| 29 | Prazepam         | N05BA11 |    | S | 10    |      |   |      |    |  |
| 30 | Prazosin         | C02CA01 |    | S | 2     |      |   |      |    |  |
| 31 | Pregabalin       | N03AX16 |    | S | 150   |      |   |      |    |  |
| 32 |                  |         |    |   |       |      |   |      |    |  |
| 33 | Primidone        | N03AA03 |    | S | 750   |      |   |      |    |  |
| 34 | Prochlorperazine | N05AB04 | AC | S | 10    | 1.25 | 4 |      |    |  |
| 35 |                  |         |    |   |       |      |   |      |    |  |
| 36 | Procyclidine     | N04AA04 | AC |   | 7.5   |      |   |      |    |  |
| 37 | Promazine        | N05AA03 | AC | S | 100   |      |   |      |    |  |
| 38 | Promethazine     | R06AD02 | AC | S | 20    | 5    |   |      |    |  |
| 39 | Propranolol      | A03AB05 | AC |   | 22.5  |      |   |      |    |  |
| 40 |                  |         |    |   |       |      |   |      |    |  |
| 41 |                  |         |    |   |       |      |   |      |    |  |
| 42 |                  |         |    |   |       |      |   |      |    |  |
| 43 |                  |         |    |   |       |      |   |      |    |  |
| 44 |                  |         |    |   |       |      |   |      |    |  |
| 45 |                  |         |    |   |       |      |   |      |    |  |
| 46 |                  |         |    |   |       |      |   |      |    |  |

|    |                 |         |    |   |       |     |  |   |  |
|----|-----------------|---------|----|---|-------|-----|--|---|--|
| 1  |                 |         |    |   |       |     |  |   |  |
| 2  |                 |         |    |   |       |     |  |   |  |
| 3  | Propiverine     | G04BD06 | AC | S | 15    |     |  |   |  |
| 4  | Quetiapine      | N05AH04 | AC | S | 50    |     |  |   |  |
| 5  |                 |         |    |   |       |     |  |   |  |
| 6  | Retigabine      | N03AX21 |    | S | 600   |     |  |   |  |
| 7  | Risperidone     | N05AX08 |    | S | 1     | 0.7 |  |   |  |
| 8  | Ropinirole      | N04BC04 |    | S | 2     |     |  |   |  |
| 9  |                 |         |    |   |       |     |  |   |  |
| 10 | Rotigotine      | N04BC09 |    | S |       |     |  | 1 |  |
| 11 | Rufinamide      | N03AF03 |    | S | 400   |     |  |   |  |
| 12 | Sertraline      | N06AB06 |    | S | 50    |     |  |   |  |
| 13 |                 |         |    |   |       |     |  |   |  |
| 14 | Solifenacin     | G04BD08 | AC |   | 5     |     |  |   |  |
| 15 |                 | G04CA53 |    |   |       |     |  |   |  |
| 16 | Sulpiride       | N05AL01 | AC | S | 400   |     |  |   |  |
| 17 | Tapentadol      | N02AX06 |    | S | 100   |     |  |   |  |
| 18 |                 |         |    |   |       |     |  |   |  |
| 19 | Temazepam       | N05CD07 |    | S | 5     |     |  |   |  |
| 20 | Terazosin       | G04CA03 |    | S | 2     |     |  |   |  |
| 21 | Tiagabine       | N03AG06 |    | S | 15    |     |  |   |  |
| 22 |                 |         |    |   | 30*   |     |  |   |  |
| 23 | Tizanidine      | M03BX02 | AC | S | 6     |     |  |   |  |
| 24 | Tolterodine     | G04BD07 | AC | S | 2     |     |  |   |  |
| 25 |                 |         |    |   |       |     |  |   |  |
| 26 | Topiramate      | N03AX11 |    | S | 50    |     |  |   |  |
| 27 | Tramadol        | N02AX02 |    | S | 200   | 200 |  |   |  |
| 28 |                 | N02AJ13 |    |   |       |     |  |   |  |
| 29 |                 |         |    |   |       |     |  |   |  |
| 30 | Trazodone       | N06AX05 |    | S | 100   |     |  |   |  |
| 31 | Triazolam       | N05CD05 |    | S | 0.125 |     |  |   |  |
| 32 | Trifluoperazine | N05AB06 | AC | S | 2     |     |  |   |  |
| 33 | Trihexyphenidyl | N04AA01 | AC |   | 5     |     |  |   |  |
| 34 |                 |         |    |   |       |     |  |   |  |
| 35 | Trimipramine    | N06AA06 | AC | S | 37.5  |     |  |   |  |
| 36 | Triprolidine    | R06AX07 | AC | S | 10    |     |  |   |  |
| 37 | Tropium         | G04BD09 | AC |   | 40    |     |  |   |  |
| 38 |                 |         |    |   |       |     |  |   |  |
| 39 | Valproic Acid   | N03AG01 |    | S | 1000  |     |  |   |  |
| 40 |                 |         |    |   |       |     |  |   |  |
| 41 |                 |         |    |   |       |     |  |   |  |
| 42 |                 |         |    |   |       |     |  |   |  |
| 43 |                 |         |    |   |       |     |  |   |  |
| 44 |                 |         |    |   |       |     |  |   |  |
| 45 |                 |         |    |   |       |     |  |   |  |
| 46 |                 |         |    |   |       |     |  |   |  |



1  
2  
3  
4  
5  
6  
7  
8  
9  
10  
11  
12  
13  
14  
15  
16  
17  
18  
19  
20  
21  
22  
23  
24  
25  
26  
27  
28  
29  
30  
31  
32  
33  
34  
35  
36  
37  
38  
39  
40  
41  
42  
43  
44  
45  
46

|                |         |    |   |      |      |  |  |  |
|----------------|---------|----|---|------|------|--|--|--|
| Venlafaxine    | N06AX16 |    | S | 75   |      |  |  |  |
| Vigabatrin     | N03AG04 |    | S | 2000 |      |  |  |  |
| Zaleplon       | N05CF03 |    | S | 5    |      |  |  |  |
| Ziprasidone    | N05AE04 |    | S | 40   |      |  |  |  |
| Zolpidem       | N05CF02 |    | S | 5    |      |  |  |  |
| Zonisamide     | N03AX15 |    | S | 300  |      |  |  |  |
| Zopiclone      | N05CF01 |    | S | 3.75 |      |  |  |  |
| Zuclopenthixol | N05AF05 | AC | S | 20   | 11.4 |  |  |  |

WHO ATC, World Health Organisation Anatomical Therapeutic Classification

\*Minimum effective daily dose if taken concurrently with agents that induce hepatic enzymes including phenytoin, carbamazepine, phenobarbitone, primidone, rifampicin and lopinavir/ritonavir.

**STROBE 2007 (v4) Statement—Checklist of items that should be included in reports of *cross-sectional studies***

| Section/Topic                | Item # | Recommendation                                                                                                                                                                       | Reported on page # |
|------------------------------|--------|--------------------------------------------------------------------------------------------------------------------------------------------------------------------------------------|--------------------|
| <b>Title and abstract</b>    | 1      | (a) Indicate the study's design with a commonly used term in the title or the abstract                                                                                               | 1, 2               |
|                              |        | (b) Provide in the abstract an informative and balanced summary of what was done and what was found                                                                                  | 2                  |
| <b>Introduction</b>          |        |                                                                                                                                                                                      |                    |
| Background/rationale         | 2      | Explain the scientific background and rationale for the investigation being reported                                                                                                 | 4                  |
| Objectives                   | 3      | State specific objectives, including any prespecified hypotheses                                                                                                                     | 4, 5               |
| <b>Methods</b>               |        |                                                                                                                                                                                      |                    |
| Study design                 | 4      | Present key elements of study design early in the paper                                                                                                                              | 5                  |
| Setting                      | 5      | Describe the setting, locations, and relevant dates, including periods of recruitment, exposure, follow-up, and data collection                                                      | 5                  |
| Participants                 | 6      | (a) Give the eligibility criteria, and the sources and methods of selection of participants                                                                                          | 5                  |
| Variables                    | 7      | Clearly define all outcomes, exposures, predictors, potential confounders, and effect modifiers. Give diagnostic criteria, if applicable                                             | 5-7                |
| Data sources/<br>measurement | 8*     | For each variable of interest, give sources of data and details of methods of assessment (measurement). Describe comparability of assessment methods if there is more than one group | 5-7                |
| Bias                         | 9      | Describe any efforts to address potential sources of bias                                                                                                                            | 5-7                |
| Study size                   | 10     | Explain how the study size was arrived at                                                                                                                                            | 5                  |
| Quantitative variables       | 11     | Explain how quantitative variables were handled in the analyses. If applicable, describe which groupings were chosen and why                                                         | 7                  |
| Statistical methods          | 12     | (a) Describe all statistical methods, including those used to control for confounding                                                                                                | 7                  |
|                              |        | (b) Describe any methods used to examine subgroups and interactions                                                                                                                  | 7                  |
|                              |        | (c) Explain how missing data were addressed                                                                                                                                          | NA                 |
|                              |        | (d) If applicable, describe analytical methods taking account of sampling strategy                                                                                                   | NA                 |
|                              |        | (e) Describe any sensitivity analyses                                                                                                                                                | NA                 |
| <b>Results</b>               |        |                                                                                                                                                                                      |                    |

|                          |     |                                                                                                                                                                                                              |            |
|--------------------------|-----|--------------------------------------------------------------------------------------------------------------------------------------------------------------------------------------------------------------|------------|
| Participants             | 13* | (a) Report numbers of individuals at each stage of study—eg numbers potentially eligible, examined for eligibility, confirmed eligible, included in the study, completing follow-up, and analysed            | 7          |
|                          |     | (b) Give reasons for non-participation at each stage                                                                                                                                                         | NA         |
|                          |     | (c) Consider use of a flow diagram                                                                                                                                                                           | NA         |
| Descriptive data         | 14* | (a) Give characteristics of study participants (eg demographic, clinical, social) and information on exposures and potential confounders                                                                     | 7          |
|                          |     | (b) Indicate number of participants with missing data for each variable of interest                                                                                                                          | NA         |
| Outcome data             | 15* | Report numbers of outcome events or summary measures                                                                                                                                                         | 7, 8       |
| Main results             | 16  | (a) Give unadjusted estimates and, if applicable, confounder-adjusted estimates and their precision (eg, 95% confidence interval). Make clear which confounders were adjusted for and why they were included | 7, Table 1 |
|                          |     | (b) Report category boundaries when continuous variables were categorized                                                                                                                                    | 7          |
|                          |     | (c) If relevant, consider translating estimates of relative risk into absolute risk for a meaningful time period                                                                                             | NA         |
| Other analyses           | 17  | Report other analyses done—eg analyses of subgroups and interactions, and sensitivity analyses                                                                                                               | 7, 8       |
| <b>Discussion</b>        |     |                                                                                                                                                                                                              |            |
| Key results              | 18  | Summarise key results with reference to study objectives                                                                                                                                                     | 8, 9       |
| Limitations              | 19  | Discuss limitations of the study, taking into account sources of potential bias or imprecision. Discuss both direction and magnitude of any potential bias                                                   | 10         |
| Interpretation           | 20  | Give a cautious overall interpretation of results considering objectives, limitations, multiplicity of analyses, results from similar studies, and other relevant evidence                                   | 10, 11     |
| Generalisability         | 21  | Discuss the generalisability (external validity) of the study results                                                                                                                                        | 9, 10      |
| <b>Other information</b> |     |                                                                                                                                                                                                              |            |
| Funding                  | 22  | Give the source of funding and the role of the funders for the present study and, if applicable, for the original study on which the present article is based                                                | 11         |

\*Give information separately for cases and controls in case-control studies and, if applicable, for exposed and unexposed groups in cohort and cross-sectional studies.

**Note:** An Explanation and Elaboration article discusses each checklist item and gives methodological background and published examples of transparent reporting. The STROBE checklist is best used in conjunction with this article (freely available on the Web sites of PLoS Medicine at <http://www.plosmedicine.org/>, Annals of Internal Medicine at <http://www.annals.org/>, and Epidemiology at <http://www.epidem.com/>). Information on the STROBE Initiative is available at [www.strobe-statement.org](http://www.strobe-statement.org).

# BMJ Open

## Anticholinergic and sedative drug burden in community-dwelling older people: a national database study

|                                 |                                                                                                                                                                                                                                                                                                                                                                                                                                                                                                                                                                                                                        |
|---------------------------------|------------------------------------------------------------------------------------------------------------------------------------------------------------------------------------------------------------------------------------------------------------------------------------------------------------------------------------------------------------------------------------------------------------------------------------------------------------------------------------------------------------------------------------------------------------------------------------------------------------------------|
| Journal:                        | <i>BMJ Open</i>                                                                                                                                                                                                                                                                                                                                                                                                                                                                                                                                                                                                        |
| Manuscript ID                   | bmjopen-2018-022500.R1                                                                                                                                                                                                                                                                                                                                                                                                                                                                                                                                                                                                 |
| Article Type:                   | Research                                                                                                                                                                                                                                                                                                                                                                                                                                                                                                                                                                                                               |
| Date Submitted by the Author:   | 08-May-2018                                                                                                                                                                                                                                                                                                                                                                                                                                                                                                                                                                                                            |
| Complete List of Authors:       | Byrne, Catherine; Royal College of Surgeons in Ireland Division of Population Health Sciences,<br>Walsh, Caroline; Royal College of Surgeons in Ireland Division of Population Health Sciences<br>Cahir, Caitriona; Royal College of Surgeons in Ireland Division of Population Health Sciences<br>Ryan, Cristin; University of Dublin Trinity College, School of Pharmacy and Pharmaceutical Sciences<br>Williams, David; Royal College of Surgeons in Ireland and Beaumont Hospital, Geriatric and Stroke Medicine<br>Bennett, Kathleen; Royal College of Surgeons in Ireland Division of Population Health Sciences |
| <b>Primary Subject Heading</b>: | Geriatric medicine                                                                                                                                                                                                                                                                                                                                                                                                                                                                                                                                                                                                     |
| Secondary Subject Heading:      | Pharmacology and therapeutics                                                                                                                                                                                                                                                                                                                                                                                                                                                                                                                                                                                          |
| Keywords:                       | Drug Burden Index, older people, anticholinergic burden, sedative burden, PRIMARY CARE, pharmacoepidemiology                                                                                                                                                                                                                                                                                                                                                                                                                                                                                                           |
|                                 |                                                                                                                                                                                                                                                                                                                                                                                                                                                                                                                                                                                                                        |

SCHOLARONE™  
Manuscripts

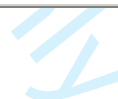

# Anticholinergic and sedative drug burden in community-dwelling older people: a national database study

Catherine J Byrne<sup>1</sup>, Caroline Walsh<sup>1</sup>, Caitriona Cahir<sup>1</sup>, Cristin Ryan<sup>2</sup>, David J Williams<sup>3</sup>, Kathleen Bennett<sup>1</sup>

<sup>1</sup>*Division of Population Health Sciences, Royal College of Surgeons in Ireland, Dublin, Ireland;* <sup>2</sup>*School of Pharmacy and Pharmaceutical Sciences, Trinity College, Dublin, Ireland;* <sup>3</sup>*Department of Geriatric and Stroke Medicine, Royal College of Surgeons in Ireland and Beaumont Hospital, Dublin, Ireland*

Correspondence to: Dr. Catherine Byrne; [catherinebyrne@rcsi.com](mailto:catherinebyrne@rcsi.com)

For peer review only

## Abstract

**Objectives:** The Drug Burden Index (DBI) tool quantifies individual exposure to anticholinergic and sedative medications. The DBI has been internationally validated against adverse health outcomes in older people. DBI exposure has not been reported in the Irish older population. This study aimed to: (i) develop a list of drugs with clinically significant anticholinergic and/or sedative effects (DBI medications) relevant to Ireland; (ii) examine, using the DBI formula, the prevalence of exposure to DBI medications in Irish older people; and (iii) explore patient factors associated DBI exposure.

**Design:** A cross-sectional national pharmacy claims database study.

**Setting:** Community setting using the General Medical Services (GMS) scheme pharmacy claims database maintained by the Health Service Executive Primary Care Reimbursement Services.

**Participants:** Irish older individuals (aged  $\geq 65$  years), enrolled in the GMS scheme, and dispensed at least one prescription item in 2016 ( $n=428,516$ ).

**Main outcome measures:** Prevalence of exposure to DBI medications and patient factors associated with DBI exposure.

**Results:** 282,874 (66%) of the GMS population aged  $\geq 65$  years were exposed to at least one DBI medication in 2016. Prevalence of exposure to DBI medications was significantly higher in females than males (females 71.6% vs. males 58.7%, adjusted OR 1.65, 95% CI 1.63-1.68). Prevalence of DBI exposure increased progressively with the number of chronic drugs used, rising from 42.7% of those prescribed 0-4 chronic drugs to 95.4% of those on  $\geq 12$  chronic drugs (adjusted OR 27.8, 95% CI 26.7-29.0). The most frequently used DBI medications were codeine/paracetamol combination products (20.1% of patients), tramadol (11.5%), zopiclone (9.5%), zolpidem (8.5%), pregabalin (7.9%) and alprazolam (7.8%).

**Conclusions:** The majority of older people in Ireland are exposed to medications with anticholinergic and/or sedative effects, particularly females and those with multiple comorbidities. The high use of low-dose codeine/paracetamol combination products, Z-drugs and benzodiazepines suggests there are opportunities for deprescribing.

## Strengths and limitations of this study

- This was a large national cross-sectional study of exposure to medications with anticholinergic or sedative effects (DBI medications) in Irish community-dwelling older people.
- A consensus list of DBI medications available in Ireland was developed and used to establish the prevalence of exposure in a highly representative population.
- The main limitations of this study result from the constraints of using pharmacy claims data, which do not include information about the clinical indication for prescriptions, and therefore it is not possible to assess the appropriateness of DBI medications.
- All medications dispensed were included in the analyses but it is not possible to confirm whether the medications were consumed.

## Introduction

Medications with anticholinergic and sedative effects carry significant risks of adverse events in older people.<sup>1</sup> However, these medications are used to treat a range of conditions that occur commonly in later life such as mental illness, sleep disturbances, nausea, pain and urinary incontinence.<sup>2</sup> In older patients, particularly those with comorbidities, this may result in an additive anticholinergic and sedative burden.<sup>3</sup> Anticholinergic medications have a range of adverse effects including dry mouth, blurred vision, constipation and urinary retention (peripheral effects), as well as dizziness, confusion, reduced concentration and delirium (central effects).<sup>4</sup> Drugs with sedative effects also cause central nervous system adverse effects, including sedation, memory and psychomotor impairment, and impairment of balance control.<sup>5-7</sup> Older people are more sensitive to these adverse effects due to age-related pharmacokinetic and pharmacodynamic changes.<sup>1</sup> In community-dwelling older people, anticholinergic and sedative drugs have been linked with an increased risk of falls,<sup>8,9</sup> functional impairment,<sup>10,11</sup> and cognitive decline.<sup>12,13</sup> Evidence to support the efficacy of some anticholinergic and sedative medications often does not justify their risks in older people.<sup>14,15</sup> Evidence suggests that deprescribing of some of these medications, such as psychotropic drugs, may result in positive patient health outcomes.<sup>16-18</sup> Therefore, reducing the inappropriate use of these medications in older people is an important public health issue.

Several tools have been developed to evaluate exposure to anticholinergic or sedative medicines. One such tool is the Drug Burden Index (DBI), which is unique when compared with other tools, as it accounts for both cumulative medication exposure and for the patient's dose.<sup>19</sup> The DBI uses the drug monograph to determine whether a drug has clinically significant anticholinergic or sedative effects by considering the pharmacology and side effect profile of the drug. The minimum efficacious dose, which is a key component of the DBI calculation, is determined according to the country-specific approved product information.<sup>2</sup> An accumulating body of evidence supports the validity of the DBI tool in terms of predicting functional impairment in older people, with observational studies from different international settings independently associating DBI exposure with poorer physical function,<sup>7,19,20</sup> frailty,<sup>21</sup> falls,<sup>15,22</sup> healthcare utilisation,<sup>15,23</sup> and, in some studies, mortality.<sup>15,23</sup>

In order to develop strategies to minimise the inappropriate use of anticholinergic and sedative medications in older people, a reliable measure for describing the magnitude of the problem and the identification of targets for improved prescribing of these medications is necessary. However, the prevalence of exposure to anticholinergic and sedative drugs using the DBI tool has not been reported in the Irish older population. Additionally, the list of DBI medications and their minimum effective daily doses needs to be tailored for the specific country of investigation, as the availability of drugs and their minimum recommended daily dose may differ between countries due to regulatory factors as well as factors that may influence drug effects such as genetics, ethnicity, diet and environment.<sup>2</sup> Furthermore, a complete list of DBI medications and minimum effective daily doses to use for screening purposes, which could be adapted to the specific country and periodically updated, has not been published. This study aimed to: (i) develop a list of drugs with clinically significant anticholinergic and/or sedative effects (DBI medications) and their corresponding minimum recommended daily doses in older people relevant



1  
2  
3  
4 to Ireland; (ii) examine, using the DBI formula, the prevalence of exposure to DBI medications in Irish  
5 community-dwelling older people; and (iii) explore patient factors of age, gender and comorbidity  
6 associated with increased exposure to DBI medications.  
7

## 8 **Methods**

### 9 ***Study population and design***

10  
11  
12  
13 This was a cross-sectional national pharmacy claims database study in the community setting. Data from  
14 the Irish Health Service Executive (HSE) Primary Care Reimbursement Services (PCRS) pharmacy claims  
15 database was used to identify the study cohort: older people (aged 65 years and over) enrolled in the  
16 General Medical Services (GMS) scheme in Ireland, who had been dispensed at least one prescription in  
17 2016. The HSE-PCRS reimburse pharmacists for the provision of prescription medication in Ireland,  
18 through a number of schemes, including the GMS scheme. The GMS database represents the single  
19 largest pharmacy claims dataset in Ireland. The GMS scheme provides mainly free health cover (a small  
20 co-payment on medicines was introduced in 2010) for those eligible and covers approximately 40% of  
21 the general Irish population. Eligibility for the GMS scheme is means tested, with a considerably higher  
22 threshold for those over 70 years of age, ensuring approximately 80% of this age group are considered  
23 eligible for the scheme.<sup>24,25</sup>  
24  
25  
26  
27

28 Medicines in the HSE-PCRS pharmacy claims database are coded according to the World Health  
29 Organisation Anatomical Therapeutic Chemical (ATC) classification system.<sup>26</sup> Permission to use the  
30 anonymised HSE-PCRS data for research purposes was obtained from the HSE-PCRS. Ethics committee  
31 approval was not required as all data were anonymised.  
32  
33

### 34 ***Measuring anticholinergic and sedative exposure***

35  
36  
37 The DBI tool was used to calculate cumulative exposure to medications with clinically significant  
38 anticholinergic and/or sedative effects (DBI medications) dispensed from 1 January to 31 December  
39 2016. For this analysis, all DBI medications (with the dose information) were identified using relevant  
40 ATC codes and subsequently extracted from the pharmacy claims database.  
41  
42

### 43 ***List of DBI medications***

44  
45 Medications with potential anticholinergic and/or sedative effects, available in Ireland, were identified  
46 by reviewing several drug monographs,<sup>27-31</sup> and previously published studies.<sup>19,20,32</sup> This list was then  
47 refined according to definitions developed by consensus between a pharmacist (CB) and a clinical  
48 pharmacologist (DW) as follows: A medication was considered to have clinically significant  
49 anticholinergic effects if the pharmacological profile of the drug included anticholinergic activity  
50 (blocking activity at muscarinic receptors) as well as a side effect profile consistent with anticholinergic  
51 effects listed in the product literature. A medication was considered to have clinically significant  
52 sedative effects if drowsiness (or a similar description) was listed as a common (occurring in >1/100 and  
53  
54  
55  
56  
57  
58  
59  
60

1  
2  
3  
4 <1/10 users) or very common (occurring in >1/10 users) adverse effect in the product literature. Topical  
5 preparations without significant systemic effects were excluded as per previous studies.<sup>19,20</sup>  
6

7 The minimum effective daily dose was decided by consensus between two pharmacists (CB, CW) after  
8 independent review of drug monographs.<sup>27-31</sup> The following assumptions were made in determining the  
9 minimum effective daily dose:  
10

11 i) The minimum effective daily dose in older people was used when stated; otherwise, the minimum  
12 effective daily adult dose was used.  
13

14 ii) For drugs initiated at a low dose and titrated to effect, the minimum effective daily maintenance dose  
15 was used.  
16

17 iii) For drugs with several indications, and when doses varied depending on the indication, the minimum  
18 effective daily dose across all indications was used, except for opiates where the minimum effective  
19 daily dose was based on the analgesic dose.  
20

21 iv) For drugs available alone and in combination with other drugs, the minimum effective daily dose for  
22 the anticholinergic/sedative drug alone was used to define the minimum effective daily dose for the  
23 anticholinergic/sedative drug in the combination product.  
24

25 v) For analgesic drugs with different doses for breakthrough pain and chronic pain, the minimum  
26 effective daily dose for chronic pain was used.  
27

28 vi) For drugs administered on an 'as needed' basis, the minimum effective daily dose was the minimum  
29 effective single dose multiplied by the minimum number of times the dose is normally repeated in 24  
30 hours.  
31

32 vii) For drugs administered by more than one route, the minimum effective daily dose for the oral route  
33 (or the most commonly used route if not administered orally) was used as the reference dose. The  
34 reference dose was converted to an equivalent dose for other available routes of administration based  
35 on reported conversion factors or bioavailability data.<sup>27,28,30,31</sup>  
36

#### 37 *Calculating DBI exposure*

38 Total DBI exposure for each individual was calculated as the sum of exposure to any DBI medication  
39 dispensed in 2016 using the following equation:<sup>19</sup>  
40

$$41 \text{DBI} = \sum D / (\delta + D)$$

42 where  $D$  is the daily dose taken by the individual patient, and  $\delta$  is the minimum effective daily dose for  
43 that drug. The daily dose taken by the individual patient for each DBI medication was estimated by  
44 multiplying the strength and total quantity dispensed in 2016, and then normalising by dividing by 365  
45 days.<sup>15</sup> DBI exposure was also quantified for each patient over one year including only chronic DBI  
46  
47  
48  
49  
50  
51  
52  
53  
54  
55  
56  
57  
58  
59  
60

1  
2  
3  
4 medications, defined as at least three prescription items dispensed in the year for the same fourth-level  
5 ATC code (e.g. N02AJ).<sup>33</sup>

### 6 7 **Statistical Analysis**

8  
9 Exposure to DBI medications was categorized dichotomously as unexposed (DBI=0) and exposed  
10 (DBI>0). Prevalence rates and associated 95% CIs for GMS eligible patients aged 65 years and over with  
11 at least one prescription dispensed in 2016 (DBI exposure) were calculated. Logistic regression was used  
12 to examine the association between DBI exposure and the following patient variables: age at first  
13 dispensing in 2016 [categorized into 65-69 (reference), 70-74, 75-79, and ≥80 years], gender [male  
14 (reference), female] and number of co-prescribed chronic medications over the year [categorized as 0-4  
15 (reference), 5-7, 8-11, and ≥12 chronic medications]. Chronic medication was defined as receiving at  
16 least three prescription items dispensed in the year with the same second-level ATC code (e.g. N02),  
17 relating to only the following first-level codes: A (alimentary tract and metabolism), B (blood and blood-  
18 forming organs), C (cardiovascular system), G (genito urinary system and sex hormones), H (systemic  
19 hormonal preparation, excluding sex hormones and insulins), L (antineoplastic and immunomodulating  
20 agents), M (musculo-skeletal system), N (nervous system), R (respiratory system) and S (sensory organs),  
21 and excluding those on the denominator of the DBI exposure.<sup>33,34</sup> Adjusted odds ratios (ORs) and 95%  
22 CIs were computed. Statistical significance at  $P<0.05$  was assumed. Statistical analyses were conducted  
23 using SAS® v 9.4 (SAS Institute Inc., Cary, NC, USA).  
24  
25  
26  
27  
28

### 29 30 **Patient and public involvement statement**

31  
32 No patients were involved in setting the research question or the outcome measures, nor were they  
33 involved in developing plans for design or implementation of the study. No patients were asked to  
34 advise on interpretation or writing up of results. There are no plans to disseminate the results of the  
35 research to study participants or the relevant patient community.  
36  
37

### 38 39 **Results**

40  
41 The final list of DBI medications (master DBI list), and their minimum effective daily doses, is provided in  
42 Supplementary Table S1. This list included 156 medications (15 with anticholinergic effects only, 87 with  
43 sedative effects only, and 54 with both anticholinergic and sedative effects). Supplementary Table S2  
44 shows the DBI medications listed in one of the original DBI studies in the USA,<sup>20</sup> but not included in the  
45 master DBI list. Supplementary Table S3 shows the DBI medications included in the master DBI list but  
46 not included in the original DBI study in the USA.<sup>20</sup>  
47  
48

49  
50 In total, 282,874 (66%) of the 428,516 GMS eligible population aged 65 years and over in receipt of any  
51 claim during 2016 received at least one claim for a DBI medication. The prevalence of chronic DBI  
52 exposure was 54.0%. Median (IQR) DBI score over the year was 0.52 (0.11-1.03).  
53

54  
55 Table 1 shows the prevalence of patients with DBI exposure in 2016 by a range of patient characteristics.  
56 Females were significantly more likely to have DBI exposure compared to males (females 71.6% vs.  
57  
58  
59  
60

1  
2  
3  
4 males 58.7%, adjusted OR 1.65, 95% CI 1.63, 1.68). Prevalence of DBI exposure increased noticeably with  
5 the number of chronic drugs used, rising progressively from 42.7% of those prescribed 0-4 chronic drugs  
6 receiving a DBI prescription to 95.4% of those on  $\geq 12$  chronic drugs (adjusted OR 27.81, 95% CI 26.72,  
7 28.96). Those aged 80 years and over had a significantly higher prevalence of DBI exposure than those  
8 aged <80 years ( $\geq 80$  years 71.5% vs. <80 years 63.5%). In multivariate analysis, the association between  
9 increasing age and DBI exposure was diminished (adjusted OR 0.82, 95% CI 0.81, 0.84).

11  
12 Table 2 shows the 10 most frequently used DBI medications by Irish older people in 2016. Codeine and  
13 tramadol were the most commonly used medications with sedative effects (20.1% and 11.5% of  
14 patients, respectively). Of the 383,641 codeine prescriptions dispensed in 2016, 98.9% were for  
15 codeine/paracetamol combination products, of which 54.6% were for low-dose codeine products  
16 (codeine/paracetamol 8 mg/500 mg per tablet), 6.9% were for medium-dose codeine products  
17 (codeine/paracetamol 15 mg/500 mg per tablet), and 38.5% were for high-dose codeine products  
18 (codeine/paracetamol 30 mg/500 mg per tablet). Prochlorperazine and hyoscine butylbromide were the  
19 most commonly used medications with anticholinergic effects (5.9% and 4.6% of patients, respectively).

21  
22 Figure 1 shows the frequency of DBI drug classes dispensed to Irish older people in 2016.  
23  
24 Anxiolytics/hypnotics and antidepressants were the most frequently prescribed drug classes of DBI  
25 medications (25% and 24% of DBI prescriptions dispensed in 2016, respectively). Of the 1,264,078  
26 anxiolytic/hypnotic prescriptions dispensed in 2016, 52.5% were for benzodiazepines, and 47.4% were  
27 for Z-drugs (zopiclone, zolpidem and zaleplon). Of the 1,211,319 antidepressant prescriptions, 47.3%  
28 were for selective serotonin reuptake inhibitors, 16.8% were for tricyclic antidepressants, 16.7% were  
29 for serotonin noradrenaline reuptake inhibitors, and 19.2% were for other antidepressants (mirtazapine,  
30 phenelzine, and trazodone).

## 31 32 33 34 35 Discussion

36  
37 This study found that the majority of older people in Ireland are exposed to medications with  
38 anticholinergic and/or sedative effects, particularly females and those with multiple comorbidities. A  
39 lower prevalence of exposure to DBI medications of 43% was reported in a previous population study of  
40 older people living in New Zealand, of similar size and methodology to the current study.<sup>15</sup> Other studies  
41 of DBI exposure conducted in Australia, USA and Europe, with smaller cohorts of older people in various  
42 settings, have demonstrated a prevalence ranging from 20% up to 79%.<sup>20,21,35,36</sup> This variability may be  
43 related to different definitions used to identify anticholinergic and sedative medications, specific  
44 sociodemographic or health status characteristics of participants, and differences in medication access  
45 and use across different settings and countries.<sup>2</sup> Further, prevalence rates calculated for the current  
46 study included DBI medications dispensed on an 'as needed' basis. There is no consistency in terms of  
47 the inclusion or exclusion of 'as needed' medications in previous studies, which may also explain the  
48 variability in prevalence rates reported.

49  
50 This current study found that female patients and patients with high comorbidity burdens, who are  
51 more likely to be very old (80+ years), all appear to be particularly vulnerable to exposure to DBI  
52  
53  
54  
55  
56  
57  
58  
59  
60

1  
2  
3  
4 medications, which is consistent with the literature.<sup>15</sup> Numerous studies have reported greater use of  
5 psychotropic drugs and analgesics by women compared to men.<sup>37-40</sup> Possible reasons for a greater use  
6 amongst women include increased willingness to seek medical care, increased likelihood of women to  
7 perceive and report mental illness or pain, and general practitioner (GP) prescribing bias.<sup>41,42</sup> It has been  
8 shown that women are more likely to receive a prescription for a psychotropic drug during a GP  
9 consultation compared to men.<sup>37</sup> Targeted efforts to reduce inappropriate prescribing of these  
10 medications in vulnerable older women are therefore needed.  
11  
12

13  
14 In the present study, exposure to medications with sedative effects was considerably higher in older  
15 people compared to exposure to medications with anticholinergic effects. This is likely to be due to the  
16 frequent use of anxiolytic/hypnotic drugs, antidepressants and opioid analgesics. Similar patterns of use  
17 have been noted in cohorts of older people living in Finland,<sup>36</sup> Australia,<sup>43,44</sup> and the USA.<sup>45</sup> However,  
18 older aged people in Ireland appear have considerably higher rates of use of codeine products and  
19 tramadol than their counterparts in Finland, according to a national population study in Finland of  
20 similar design to the present study.<sup>23</sup>  
21  
22

23  
24 Examination of the most frequently used DBI medications (Table 2) suggests there may be opportunities  
25 for deprescribing of DBI medications in older Irish people. The high use of low-dose  
26 codeine/paracetamol combinations is of particular concern. It is known that codeine doses of at least 30  
27 mg are required for analgesia.<sup>46</sup> At this dose, a small but statistically significant increase in the analgesic  
28 effect of codeine/paracetamol combinations compared to paracetamol alone has been shown.<sup>46,47</sup>  
29 However, there is a lack of pharmacological evidence to support the analgesic benefit from using low-  
30 dose codeine combination analgesics.<sup>48</sup> Combining low-doses of codeine with paracetamol is likely to  
31 bring minimal analgesic benefit, but will increase the risk of adverse effects.<sup>49</sup> The most frequently  
32 prescribed codeine combination product in our study contained 8 mg of codeine and 500 mg of  
33 paracetamol per tablet. Thus, at the maximal dose of two tablets (16 mg/1000 mg  
34 codeine/paracetamol), the quantity of codeine would not achieve doses close to the minimum effective  
35 dose of codeine required for analgesia. Yet, these products will still induce the adverse effects  
36 experienced with codeine, including constipation, nausea, dry mouth, dizziness and drowsiness.<sup>50</sup>  
37 Further, the use of codeine in older people has been associated with an increased risk of falls and hip  
38 fracture (60% increased risk),<sup>51</sup> which highlights the need to limit its use.<sup>52</sup> Therefore, use of a  
39 paracetamol alone product, rather than a combined low-dose codeine/paracetamol product, may be  
40 more appropriate for some patients.  
41  
42  
43  
44  
45

46  
47 The high use of hypnotic Z-drugs and anxiolytic benzodiazepines (alprazolam and diazepam) is also  
48 noteworthy. Widespread use of benzodiazepines and Z-drugs has been reported in other European  
49 countries.<sup>53,54</sup> These drugs should be used with caution due to their adverse effect profile, such as  
50 drowsiness, confusion, impairment of memory, and incoordination, which can be particularly  
51 problematic in older people.<sup>55</sup> Both benzodiazepines and Z-drugs have been associated with problems in  
52 older people including an increased risk of injurious falls and hip fracture, and cognitive impairment.<sup>14,17</sup>  
53 It is therefore recommended that these drugs be avoided in older people and, where appropriate,  
54 discontinuation under appropriate supervision is widely advised.<sup>17,56</sup> It has been shown that  
55  
56  
57  
58  
59  
60

1  
2  
3  
4 discontinuation of benzodiazepines and Z-drugs in community-dwelling older people is possible, without  
5 adverse events attributable to discontinuation, and may be associated with improved health outcomes,  
6 such as a reduction in the risk of falls and improvements in cognitive functioning.<sup>16,57,58</sup> A meta-analysis  
7 of interventions to reduce benzodiazepine and Z-drug use in older people demonstrated the beneficial  
8 effects of consultations and education of both prescribers and patients, followed by a supervised  
9 withdrawal.<sup>59</sup>

### 11 ***Strengths and limitations***

12  
13  
14 The present study was a large national study of DBI exposure in community-dwelling older patients in  
15 Ireland. The study design enabled examination of the variation in DBI exposure between patients in a  
16 highly representative population. A consensus list of DBI medications was developed, which may be of  
17 use for future studies using the DBI tool.

18  
19  
20 The authors acknowledge the following limitations. These largely result from the constraints of using  
21 pharmacy claims data in this study. Information about the clinical indication for prescriptions is not  
22 available in pharmacy claims data and therefore it is not possible to assess the appropriateness of DBI  
23 prescriptions. DBI prescribing may not always be inappropriate. The prescription may be justified for  
24 clinical reasons, after balancing risk and benefit in conditions of uncertainty. Nevertheless, given that  
25 DBI medications have been associated with adverse events in older people, the observed high  
26 prevalence of DBI prescribing suggests that a significant amount of prescribing could be improved. In  
27 addition, pharmacy claims data does not include medications purchased over-the-counter (OTC).  
28 However, there is no incentive for GMS patients to buy medications OTC, as most of these items are  
29 available on prescription for a small co-payment, and therefore the risk of bias is expected to be low. All  
30 medications dispensed were included in the analyses but it was not possible to confirm whether the  
31 dispensed medications were consumed and for how long. Therefore, the DBI calculations may not  
32 reflect true exposure. However, the results reflect prescribing practice in terms of intention to prescribe.  
33 There is also the possibility of socioeconomic bias, particularly in the 65-69 year age group, as only 40%  
34 of this population is covered under the GMS scheme, which over represents more socially deprived  
35 individuals. However, approximately 80% of those aged  $\geq 70$  years are covered for medications under the  
36 GMS scheme and, therefore, socioeconomic bias in these patients would be low. Another notable  
37 limitation involves the list of DBI medications used in this analysis, which, although determined by  
38 consensus, may be associated with interpretation bias leading to an over- or under-estimation of the  
39 prevalence of DBI exposure. There is no gold standard definition to describe medications with clinically  
40 significant anticholinergic or sedative effects and therefore the clinical validity of our selection of drugs  
41 may be limited by this. Finally, the master DBI list provided in this study (Supplementary Table S1) was  
42 based on medications and dosages relevant to prescribing in Ireland. Therefore, there may be  
43 medications available in other countries that are not on this list, and there may be medications on this  
44 list that are not available in other countries. The minimum effective dosages applied refer to prescribing  
45 in Ireland. Therefore, whilst the master DBI list provided could be used as a starting point in other  
46 countries, adaption to the local setting in terms of availability of drugs and dosage is necessary.

### ***Implications for policy and practice***

The results of this present study highlight the need for interventions to reduce the inappropriate use of medications with clinically significant anticholinergic or sedative effects in older people in Ireland. In particular, the high use of low-dose codeine/paracetamol combination products, Z-drugs and benzodiazepines, suggests that interventions to alert prescribers and patients about the risks associated with these drugs in older people should be a priority. Due consideration should also be given to the importance of regular medication reviews, with a particular focus on older females and those with multiple comorbidities.

In practice, the DBI may be useful as a screening tool for older patients, to identify those patients with high exposure, which may compromise their physical and cognitive functioning.<sup>60</sup> Such patients are likely to be eligible for deprescribing interventions such as medication review.<sup>60</sup> A previous intervention study showed that collaborative pharmacist-led medication review with the GP can reduce the prescribing of sedative and anticholinergic medications in older people, resulting in a significant decrease in the DBI score.<sup>61</sup> At the population level, the DBI tool could be used as a quality indicator to guide policy to improve prescribing and optimise clinical outcomes in older people.<sup>15</sup>

### ***Conclusions***

In conclusion, this large population-based study has shown that there is a high prevalence of use of medications with anticholinergic and sedative effects among Irish community-dwelling older people, particularly in females and those with multiple comorbidities. The high use of low-dose codeine/paracetamol combination products, Z-drugs and benzodiazepines, suggests that there are opportunities for deprescribing in this population. The consensus list of DBI medications developed may be of use in future studies using the DBI tool. Future research should focus on examining the impact of DBI on important health outcomes in older Irish patients, and developing interventions to reduce the inappropriate use of DBI medications in this vulnerable patient population.

### ***Acknowledgements***

We thank the HSE-PCRS for supplying the data on which the study was based. Funding from the Health Research Board in Ireland (RL-2015-1579) supported the research.

### ***Footnotes***

**Contributors:** CB and KB conceived and designed the study. CB, CW, DW and CR contributed to development of the DBI medication list. KB accessed the data (HSE-PCRS). KB, CB and CC performed the analysis and interpreted the results. CB wrote the manuscript. All authors critically revised the manuscript and approved the final version.

**Funding:** This work was supported by the Health Research Board in Ireland (grant code RL-2015-1579). The funder had no role in the conduct of the study.

1  
2  
3  
4 **Competing interests:** None declared.

5  
6 **Patient consent:** Not required.

7  
8 **Ethical approval:** The anonymised data in this study were exempt from review by an institutional review  
9 board.

10  
11  
12 **Provenance and peer review:** Not commissioned; externally peer reviewed.

13  
14 **Data sharing statement:** No additional data available.

15  
16  
17  
18  
19  
20  
21  
22  
23  
24  
25  
26  
27  
28  
29  
30  
31  
32  
33  
34  
35  
36  
37  
38  
39  
40  
41  
42  
43  
44  
45  
46  
47  
48  
49  
50  
51  
52  
53  
54  
55  
56  
57  
58  
59  
60

For peer review only



## References

1. Sumukadas D, McMurdo ME, Mangoni AA, *et al.* Temporal trends in anticholinergic medication prescription in older people: repeated cross-sectional analysis of population prescribing data. *Age Ageing* 2014; **43**:515-521.
2. Kouladjian L, Gnjjidic D, Chen TF, *et al.* Drug Burden Index in older adults: theoretical and practical issues. *Clin Interv Aging* 2014; **9**:1503-1515.
3. Han L, Agostini JV, Allore HG. Cumulative anticholinergic exposure is associated with poor memory and executive function in older men. *J Am Geriatr Soc* 2008; **56**:2203-2210.
4. Fox C, Richardson K, Maidment ID, *et al.* Anticholinergic medication use and cognitive impairment in the older population: the medical research council cognitive function and ageing study. *J Am Geriatr Soc* 2011; **59**:1477-1483.
5. Taipale HT, Hartikainen S, Bell JS. A comparison of four methods to quantify the cumulative effect of taking multiple drugs with sedative properties. *Am J Geriatr Pharmacother* 2010; **8**:460-471.
6. Cutson TM, Gray SL, Hughes MA, *et al.* Effect of a single dose of diazepam on balance measures in older people. *J Am Geriatr Soc* 1997; **45**:435-440.
7. Gnjjidic D, Cumming RG, Le Couteur DG, *et al.* Drug Burden Index and physical function in older Australian men. *Br J Clin Pharmacol* 2009; **68**:97-105.
8. Tinetti ME, Speechley M, Ginter SF. Risk factors for falls among elderly persons living in the community. *N Engl J Med* 1988; **319**:1701-1707.
9. Landi F, Onder G, Cesari M, *et al.* Psychotropic medications and risk for falls among community-dwelling frail older people: an observational study. *J Gerontol A Biol Sci Med Sci* 2005; **60**:622-626.
10. Landi F, Russo A, Liperoti R, *et al.* Anticholinergic drugs and physical function among frail elderly population. *Clin Pharmacol Ther* 2007; **81**:235-241.
11. Gray SL, LaCroix AZ, Hanlon JT, *et al.* Benzodiazepine use and physical disability in community-dwelling older adults. *J Am Geriatr Soc* 2006; **54**:224-230.
12. Carriere I, Fourrier-Reglat A, Dartigues JF, *et al.* Drugs with anticholinergic properties, cognitive decline, and dementia in an elderly general population: the 3-city study. *Arch Intern Med* 2009; **169**:1317-1324.
13. Hanlon JT, Horner RD, Schmader KE, *et al.* Benzodiazepine use and cognitive function among community-dwelling elderly. *Clin Pharmacol Ther* 1998; **64**:684-692.
14. Glass J, Lanctot KL, Herrmann N, *et al.* Sedative hypnotics in older people with insomnia: meta-analysis of risks and benefits. *Bmj* 2005; **331**:1169.
15. Nishtala PS, Narayan SW, Wang T, *et al.* Associations of drug burden index with falls, general practitioner visits, and mortality in older people. *Pharmacoepidemiol Drug Saf* 2014; **23**:753-758.
16. Campbell AJ, Robertson MC, Gardner MM, *et al.* Psychotropic medication withdrawal and a home-based exercise program to prevent falls: a randomized, controlled trial. *J Am Geriatr Soc* 1999; **47**:850-853.
17. Cumming RG, Le Couteur DG. Benzodiazepines and risk of hip fractures in older people: a review of the evidence. *CNS Drugs* 2003; **17**:825-837.
18. Garfinkel D, Mangin D. Feasibility study of a systematic approach for discontinuation of multiple medications in older adults: addressing polypharmacy. *Arch Intern Med* 2010; **170**:1648-1654.
19. Hilmer SN, Mager DE, Simonsick EM, *et al.* A drug burden index to define the functional burden of medications in older people. *Arch Intern Med* 2007; **167**:781-787.
20. Hilmer SN, Mager DE, Simonsick EM, *et al.* Drug burden index score and functional decline in older people. *Am J Med* 2009; **122**:1142-1149.

21. Gnjjidic D, Hilmer SN, Blyth FM, *et al.* High-risk prescribing and incidence of frailty among older community-dwelling men. *Clin Pharmacol Ther* 2012; **91**:521-528.
22. Wilson NM, Hilmer SN, March LM, *et al.* Associations between drug burden index and falls in older people in residential aged care. *J Am Geriatr Soc* 2011; **59**:875-880.
23. Gnjjidic D, Hilmer SN, Hartikainen S, *et al.* Impact of high risk drug use on hospitalization and mortality in older people with and without Alzheimer's disease: a national population cohort study. *PLoS One* 2014; **9**:e83224.
24. Health Service Executive. Primary Care Reimbursement Service: Statistical Analysis of Claims and Payments 2015. Dublin, Ireland: Health Service Executive, 2015.
25. Central Statistics Office. Census of Population 2016 - Profile 3 An Age Profile of Ireland. <http://www.cso.ie/en/statistics/> (Accessed 1 December 2017).
26. WHO Collaborating Centre for Drug Statistics Methodology, ATC/DDD Index 2017. [https://www.whooc.no/atc\\_ddd\\_index/](https://www.whooc.no/atc_ddd_index/)
27. Medicines.ie. Medicines information online - Summary of Product Characteristics. <http://www.medicines.ie/> (Accessed July to October 2017).
28. Medicines.org.uk. Electronic Medicines Compendium (eMC). <http://www.medicines.org.uk/emc/> (Accessed July to October 2017).
29. Medicines Complete. British National Formulary (BNF) 2017. <https://www.medicinescomplete.com/mc/bnf/current/search.htm?q=bnf> (Accessed July to October 2017).
30. Medicines Complete. Martindale: The Complete Drug Reference 2017. <https://www.medicinescomplete.com/mc/martindale/> (Accessed July to October 2017).
31. Semla TP, Beizer JL, Higbee MD. Geriatric dosage handbook: Including clinical recommendations and monitoring guidelines (21st Edition). Hudson, Ohio: Lexicomp; 2016.
32. Ailabouni N, Mangin D, Nishtala PS. Deprescribing anticholinergic and sedative medicines: protocol for a Feasibility Trial (DEFEAT-polypharmacy) in residential aged care facilities. *BMJ Open* 2017; **7**:e013800.
33. Cahir C, Fahey T, Teeling M, *et al.* Potentially inappropriate prescribing and cost outcomes for older people: a national population study. *Br J Clin Pharmacol* 2010; **69**:543-552.
34. Byrne CJ, Cahir C, Curran C, *et al.* High-risk prescribing in an Irish primary care population: trends and variation. *Br J Clin Pharmacol* 2017; **83**:2821-2830.
35. Bosboom PR, Alfonso H, Almeida OP, *et al.* Use of Potentially Harmful Medications and Health-Related Quality of Life among People with Dementia Living in Residential Aged Care Facilities. *Dement Geriatr Cogn Dis Extra* 2012; **2**:361-371.
36. Gnjjidic D, Bell JS, Hilmer SN, *et al.* Drug Burden Index associated with function in community-dwelling older people in Finland: a cross-sectional study. *Ann Med* 2012; **44**:458-467.
37. Simoni-Wastila L. Gender and psychotropic drug use. *Med Care* 1998; **36**:88-94.
38. Tu K, Mamdani MM, Hux JE, *et al.* Progressive trends in the prevalence of benzodiazepine prescribing in older people in Ontario, Canada. *J Am Geriatr Soc* 2001; **49**:1341-1345.
39. Goulding MR. Inappropriate medication prescribing for elderly ambulatory care patients. *Arch Intern Med* 2004; **164**:305-312.
40. Bierman AS, Pugh MJ, Dhalla I, *et al.* Sex differences in inappropriate prescribing among elderly veterans. *Am J Geriatr Pharmacother* 2007; **5**:147-161.
41. Cafferata GL, Meyers SM. Pathways to psychotropic drugs. Understanding the basis of gender differences. *Med Care* 1990; **28**:285-300.
42. van der Waals FW, Mohrs J, Foets M. Sex differences among recipients of benzodiazepines in Dutch general practice. *Bmj* 1993; **307**:363-366.

- 1
- 2
- 3
- 4 43. Wilson NM, Hilmer SN, March LM, *et al.* Associations between drug burden index and physical
- 5 function in older people in residential aged care facilities. *Age Ageing* 2010; **39**:503-507.
- 6 44. Gnjdic D, Le Couteur DG, Abernethy DR, *et al.* Drug burden index and beers criteria: impact on
- 7 functional outcomes in older people living in self-care retirement villages. *J Clin Pharmacol* 2012;
- 8 **52**:258-265.
- 9 45. Cao YJ, Mager DE, Simonsick EM, *et al.* Physical and cognitive performance and burden of
- 10 anticholinergics, sedatives, and ACE inhibitors in older women. *Clin Pharmacol Ther* 2008; **83**:422-429.
- 11 46. Shaheed CA, Maher CG, McLachlan AJ. Investigating the efficacy and safety of over-the-counter
- 12 codeine combination analgesics for pain and codeine based antitussives. Woden, Australia: Government
- 13 of Australia, Department of Health, Therapeutic Goods Administration, 2016.
- 14 47. de Craen AJ, Di Giulio G, Lampe-Schoenmaeckers JE, *et al.* Analgesic efficacy and safety of
- 15 paracetamol-codeine combinations versus paracetamol alone: a systematic review. *Bmj* 1996; **313**:321-
- 16 325.
- 17 48. Robinson GM, Robinson S, McCarthy P, *et al.* Misuse of over-the-counter codeine-containing
- 18 analgesics: dependence and other adverse effects. *N Z Med J* 2010; **123**:59-64.
- 19 49. Ferner RE, Beard K. Over the counter medicines: proceed with caution. *Bmj* 2008; **336**:694-696.
- 20 50. Moore RA, McQuay HJ. Prevalence of opioid adverse events in chronic non-malignant pain:
- 21 systematic review of randomised trials of oral opioids. *Arthritis Res Ther* 2005; **7**:R1046-1051.
- 22 51. Shorr RI, Griffin MR, Daugherty JR, *et al.* Opioid analgesics and the risk of hip fracture in the elderly:
- 23 codeine and propoxyphene. *J Gerontol* 1992; **47**:M111-115.
- 24 52. McLachlan AJ, Bath S, Naganathan V, *et al.* Clinical pharmacology of analgesic medicines in older
- 25 people: impact of frailty and cognitive impairment. *Br J Clin Pharmacol* 2011; **71**:351-364.
- 26 53. Huerta C, Abbing-Karahagopian V, Requena G, *et al.* Exposure to benzodiazepines (anxiolytics,
- 27 hypnotics and related drugs) in seven European electronic healthcare databases: a cross-national
- 28 descriptive study from the PROTECT-EU Project. *Pharmacoepidemiol Drug Saf* 2016; **25 Suppl 1**:56-65.
- 29 54. Benard-Laribiere A, Noize P, Pambrun E, *et al.* Trends in incident use of benzodiazepines and Z-drugs
- 30 in France from 2006 to 2012: a population-based study. *Pharmacoepidemiol Drug Saf* 2017; **26**:162-169.
- 31 55. Davidson JR, Zhang W, Connor KM, *et al.* A psychopharmacological treatment algorithm for
- 32 generalised anxiety disorder (GAD). *J Psychopharmacol* 2010; **24**:3-26.
- 33 56. Bourgeois J, Elseviers MM, Van Bortel L, *et al.* Feasibility of discontinuing chronic benzodiazepine use
- 34 in nursing home residents: a pilot study. *Eur J Clin Pharmacol* 2014; **70**:1251-1260.
- 35 57. Curran HV, Collins R, Fletcher S, *et al.* Older adults and withdrawal from benzodiazepine hypnotics in
- 36 general practice: effects on cognitive function, sleep, mood and quality of life. *Psychol Med* 2003;
- 37 **33**:1223-1237.
- 38 58. Tsunoda K, Uchida H, Suzuki T, *et al.* Effects of discontinuing benzodiazepine-derivative hypnotics on
- 39 postural sway and cognitive functions in the elderly. *Int J Geriatr Psychiatry* 2010; **25**:1259-1265.
- 40 59. Gould RL, Coulson MC, Patel N, *et al.* Interventions for reducing benzodiazepine use in older people:
- 41 meta-analysis of randomised controlled trials. *Br J Psychiatry* 2014; **204**:98-107.
- 42 60. Wouters H, van der Meer H, Taxis K. Quantification of anticholinergic and sedative drug load with the
- 43 Drug Burden Index: a review of outcomes and methodological quality of studies. *Eur J Clin Pharmacol*
- 44 2017; **73**:257-266.
- 45 61. Nishtala PS, Hilmer SN, McLachlan AJ, *et al.* Impact of residential medication management reviews on
- 46 drug burden index in aged-care homes: a retrospective analysis. *Drugs Aging* 2009; **26**:677-686.
- 47
- 48
- 49
- 50
- 51
- 52
- 53
- 54
- 55
- 56
- 57
- 58
- 59
- 60

**Table 1.** Prevalence of patients aged 65 years and over dispensed at least one Drug Burden Index medication prescription in 2016

| Patient level fixed effects ( <i>n</i> ) | % dispensed a DBI prescription | Odds ratio (95% CI) |                     |
|------------------------------------------|--------------------------------|---------------------|---------------------|
|                                          |                                | Unadjusted          | Adjusted            |
| Sex:                                     |                                |                     |                     |
| Male (185938)                            | 58.7                           | 1.00                | 1.00                |
| Female (242578)                          | 71.6                           | 1.78 (1.75-1.80)    | 1.65 (1.63-1.68)    |
| Number of chronic drugs:                 |                                |                     |                     |
| 0-4 (153960)                             | 42.7                           | 1.00                | 1.00                |
| 5-7 (113614)                             | 66.4                           | 2.65 (2.60-2.69)    | 2.67 (2.63-2.71)    |
| 8-11 (102682)                            | 83.9                           | 6.96 (6.82-7.09)    | 7.03 (6.89-7.17)    |
| ≥12 (58260)                              | 95.4                           | 27.63 (26.55-28.76) | 27.81 (26.72-28.96) |
| Age (years):                             |                                |                     |                     |
| 65-69 (96804)                            | 63.5                           | 1.00                | 1.00                |
| 70-74 (109118)                           | 62.4                           | 0.95 (0.94-0.97)    | 0.85 (0.83-0.87)    |
| 75-79 (93300)                            | 65.3                           | 1.09 (1.07-1.11)    | 0.81 (0.80-0.83)    |
| ≥80 (129294)                             | 71.5                           | 1.44 (1.42-1.47)    | 0.82 (0.81-0.84)    |

*n*, number of patients; DBI, Drug Burden Index; CI, confidence interval

**Table 2.** Most frequently used Drug Burden Index medications in Irish older people in 2016<sup>a</sup>

| Medication       | Anticholinergic/sedative effects | % patients |
|------------------|----------------------------------|------------|
| Codeine          | Sedative                         | 20.1       |
| Tramadol         | Sedative                         | 11.5       |
| Zopiclone        | Sedative                         | 9.5        |
| Zolpidem         | Sedative                         | 8.5        |
| Pregabalin       | Sedative                         | 7.9        |
| Alprazolam       | Sedative                         | 7.8        |
| Diazepam         | Sedative                         | 6.5        |
| Escitalopram     | Sedative                         | 5.9        |
| Prochlorperazine | Anticholinergic + Sedative       | 5.9        |
| Mirtazapine      | Sedative                         | 4.8        |

<sup>a</sup>Prevalence calculated by the number of patients dispensed at least one prescription for a Drug Burden Index medication divided by the total number of patients dispensed at least one prescription in 2016.

## Figure legends

**Figure 1.** Percentage and 95% confidence intervals of anticholinergic and/or sedative medication prescriptions dispensed by drug class in Irish older patients in 2016. Other=antiparkinson drugs, cardiovascular drugs, gastrointestinal drugs, and muscle relaxants.

1  
2  
3  
4  
5  
6  
7  
8  
9  
10  
11  
12  
13  
14  
15  
16  
17  
18  
19  
20  
21  
22  
23  
24  
25  
26  
27  
28  
29  
30  
31  
32  
33  
34  
35  
36  
37  
38  
39  
40  
41  
42  
43  
44  
45  
46  
47  
48  
49  
50  
51  
52  
53  
54  
55  
56  
57  
58  
59  
60

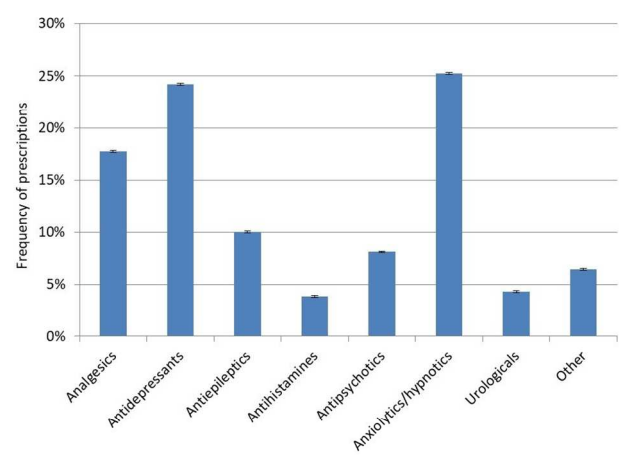

Figure 1. Percentage and 95% confidence intervals of anticholinergic and/or sedative medication prescriptions dispensed by drug class in Irish older patients in 2016. Other=antiparkinson drugs, cardiovascular drugs, gastrointestinal drugs, and muscle relaxants.

125x90mm (300 x 300 DPI)

View Only

**SupplementaryTable S1.** Master Drug Burden Index (DBI) list - medications for inclusion in the calculation of DBI

| Drug             | WHO ATC Code/s     | Anticholinergic effects (AC) | Sedative effects (S) | Minimum effective daily dose by route of administration (mg) |            |                   |             |        |            |
|------------------|--------------------|------------------------------|----------------------|--------------------------------------------------------------|------------|-------------------|-------------|--------|------------|
|                  |                    |                              |                      | Oral                                                         | Parenteral | Sublingual/buccal | Transdermal | Rectal | Inhalation |
| Alimemazine      | R06AD01            | AC                           | S                    | 10                                                           |            |                   |             |        |            |
| Alprazolam       | N05BA12            |                              | S                    | 0.5                                                          |            |                   |             |        |            |
| Amantadine       | N04BB01            | AC                           |                      | 100                                                          |            |                   |             |        |            |
| Amisulpride      | N05AL05            |                              | S                    | 50                                                           |            |                   |             |        |            |
| Amitriptyline    | N06AA09            | AC                           | S                    | 10                                                           |            |                   |             |        |            |
| Aripiprazole     | N05AX12            |                              | S                    | 10                                                           | 10         |                   |             |        |            |
| Asenapine        | N05AH05            |                              | S                    |                                                              |            | 10                |             |        |            |
| Atropine         | A03BA01<br>AO3CB03 | AC                           |                      | 0.6                                                          | 0.3        |                   |             |        |            |
| Baclofen         | M03BX01            |                              | S                    | 30                                                           | 30         |                   |             |        |            |
| Benperidol       | N05AD07            |                              | S                    | 0.125                                                        |            |                   |             |        |            |
| Benzatropine     | N04AC01            | AC                           |                      | 0.5                                                          | 0.5        |                   |             |        |            |
| Biperiden        | N04AA02            | AC                           | S                    | 1                                                            |            |                   |             |        |            |
| Brompheniramine  | R06AB01<br>R06AB51 | AC                           | S                    | 16                                                           |            |                   |             |        |            |
| Buclizine        | R06AE51<br>R06AE01 | AC                           | S                    | 12.5                                                         |            |                   |             |        |            |
| Buprenorphine    | N02AE01            |                              | S                    |                                                              | 0.12       | 0.4               | 0.12        |        |            |
| Buspironone      | N05BE01            |                              | S                    | 15                                                           |            |                   |             |        |            |
| Carbamazepine    | N03AF01            | AC                           | S                    | 400                                                          |            |                   |             | 500    |            |
| Cetirizine       | R06AE07            |                              | S                    | 10                                                           |            |                   |             |        |            |
| Cloral Hydrate   | N05CC01            |                              | S                    | 430                                                          |            |                   |             |        |            |
| Chlordiazepoxide | N05BA02            |                              | S                    | 5                                                            |            |                   |             |        |            |
| Chlorphenamine   | R06AB04            | AC                           | S                    | 8                                                            | 3          |                   |             |        |            |
| Chlorpromazine   | N05AA01            | AC                           | S                    | 30                                                           | 6          |                   |             |        |            |
| Cinnarizine      | N07CA02            | AC                           | S                    | 60                                                           |            |                   |             |        |            |

|                     |                                          |    |   |     |     |  |  |   |  |
|---------------------|------------------------------------------|----|---|-----|-----|--|--|---|--|
|                     | N07CA52                                  |    |   |     |     |  |  |   |  |
| Citalopram          | N06AB04                                  |    | S | 10  |     |  |  |   |  |
| Clemastine          | R06AA04<br>R06AA54                       | AC | S | 2   |     |  |  |   |  |
| Clobazam            | N05BA09                                  |    | S | 10  |     |  |  |   |  |
| Clomethiazole       | N05CM0<br>N05CX04                        |    | S | 192 |     |  |  |   |  |
| Clomipramine        | N06AA04                                  | AC | S | 30  |     |  |  |   |  |
| Clonazepam          | N03AE01                                  |    | S | 0.5 | 0.5 |  |  |   |  |
| Clonidine           | N02CX02<br>C02AC01                       |    | S | 0.1 |     |  |  |   |  |
| Clozapine           | N05AH02                                  | AC | S | 25  |     |  |  |   |  |
| Codeine             | R05DA04<br>N02AJ06                       |    | S | 120 |     |  |  |   |  |
| Cyclizine           | R06AE03<br>N02AA51                       | AC | S | 50  | 50  |  |  |   |  |
| Cyproheptadine      | RO6AX02                                  | AC | S | 4   |     |  |  |   |  |
| Darifenacin         | G04BD10                                  | AC |   | 7.5 |     |  |  |   |  |
| Dexchlorpheniramine | R06AB02<br>R06AB52                       | AC | S | 8   |     |  |  |   |  |
| Diazepam            | N05BA01                                  |    | S | 1   | 1   |  |  | 1 |  |
| Dicycloverine       | A03AA07                                  | AC |   | 30  |     |  |  |   |  |
| Dihydrocodeine      | N02AA08<br>N02AJ01                       |    | S | 40  |     |  |  |   |  |
| Dimenhydrinate      | R06AA02<br>N07CA52                       | AC | S | 150 |     |  |  |   |  |
| Diphenhydramine     | N02BE71<br>N02BE51<br>R06AA02<br>R06AA52 | AC | S | 50  |     |  |  |   |  |
| Diphenoxylate       | A07DA01                                  |    | S | 5   |     |  |  |   |  |

|    |                       |         |    |   |       |      |     |     |  |
|----|-----------------------|---------|----|---|-------|------|-----|-----|--|
| 1  |                       |         |    |   |       |      |     |     |  |
| 2  |                       |         |    |   |       |      |     |     |  |
| 3  |                       |         |    |   |       |      |     |     |  |
| 4  |                       |         |    |   |       |      |     |     |  |
| 5  | Disopyramide          | C01BA03 | AC |   | 300   | 300  |     |     |  |
| 6  | Dosulepin             | N06AA16 | AC | S | 50    |      |     |     |  |
| 7  | Doxazosin             | C02CA04 |    | S | 2     |      |     |     |  |
| 8  | Doxepin               | N06AA12 | AC | S | 25    |      |     |     |  |
| 9  |                       |         |    |   |       |      |     |     |  |
| 10 | Doxylamine            | R06AA09 | AC | S | 25    |      |     |     |  |
| 11 |                       | R06AA59 |    |   |       |      |     |     |  |
| 12 |                       | N02BE51 |    |   |       |      |     |     |  |
| 13 | Duloxetine            | N06AX21 |    | S | 30    |      |     |     |  |
| 14 | Escitalopram          | N06AB10 |    | S | 5     |      |     |     |  |
| 15 |                       |         |    |   |       |      |     |     |  |
| 16 | Fentanyl              | N02AB03 |    | S |       | 0.3  | 0.6 | 0.3 |  |
| 17 | Fesoterodine          | G04BD11 | AC |   | 4     |      |     |     |  |
| 18 | Fexofenadine          | R06AX26 |    | S | 120   |      |     |     |  |
| 19 | Flavoxate             | G04BD02 | AC | S | 600   |      |     |     |  |
| 20 | Flunitrazepam         | N05CD03 |    | S | 0.5   |      |     |     |  |
| 21 |                       |         |    |   |       |      |     |     |  |
| 22 | Fluoxetine            | N06AB03 |    | S | 20    |      |     |     |  |
| 23 | Flupentixol           | N05AF01 | AC | S | 0.5   | 0.3  |     |     |  |
| 24 | Fluphenazine          | N05AB02 | AC | S |       | 0.36 |     |     |  |
| 25 |                       |         |    |   |       |      |     |     |  |
| 26 | Flurazepam            | N05CD01 |    | S | 15    |      |     |     |  |
| 27 | Fluvoxamine           | N06AB08 |    | S | 100   |      |     |     |  |
| 28 | Gabapentin            | N03AX12 |    | S | 900   |      |     |     |  |
| 29 | Glycopyrronium        | A03AB02 | AC | S | 2     | 0.2  |     |     |  |
| 30 | Haloperidol           | N05AD01 |    | S | 0.5   | 0.25 |     |     |  |
| 31 | Hydromorphone         | N02AA03 |    | S | 7.8   | 2.6  |     |     |  |
| 32 |                       |         |    |   |       |      |     |     |  |
| 33 | Hydroxyzine           | N05BB01 | AC | S | 25    |      |     |     |  |
| 34 | Hyoscine base         | A04AD01 | AC | S |       |      |     | 0.5 |  |
| 35 | Hyoscine Butylbromide | A03BB01 | AC |   | 30    | 30   |     |     |  |
| 36 | Hyoscine Hydrobromide | A04AD01 | AC | S | 0.9   |      |     | 0.5 |  |
| 37 |                       |         |    |   |       |      |     |     |  |
| 38 | Hyoscyamine           | A03CB31 | AC |   | 0.375 |      |     |     |  |
| 39 |                       | A03BA03 |    |   |       |      |     |     |  |
| 40 |                       |         |    |   |       |      |     |     |  |
| 41 |                       |         |    |   |       |      |     |     |  |
| 42 |                       |         |    |   |       |      |     |     |  |
| 43 |                       |         |    |   |       |      |     |     |  |
| 44 |                       |         |    |   |       |      |     |     |  |
| 45 |                       |         |    |   |       |      |     |     |  |
| 46 |                       |         |    |   |       |      |     |     |  |
| 47 |                       |         |    |   |       |      |     |     |  |



|    |                 |         |    |   |      |      |  |  |  |     |
|----|-----------------|---------|----|---|------|------|--|--|--|-----|
| 1  |                 |         |    |   |      |      |  |  |  |     |
| 2  |                 |         |    |   |      |      |  |  |  |     |
| 3  |                 |         |    |   |      |      |  |  |  |     |
| 4  |                 |         |    |   |      |      |  |  |  |     |
| 5  | Imipramine      | N06AA02 | AC | S | 30   |      |  |  |  |     |
| 6  | Indoramin       | C02CA02 |    | S | 20   |      |  |  |  |     |
| 7  | Lamotrigine     | N03AX09 |    | S | 100  |      |  |  |  |     |
| 8  |                 |         |    |   | 200* |      |  |  |  |     |
| 9  | Levetiracetam   | N03AX14 |    | S | 1000 |      |  |  |  |     |
| 10 | Levocetirizine  | R06AE09 |    | S | 5    |      |  |  |  |     |
| 11 | Levomepromazine | N05AA02 | AC | S | 37.5 | 37.5 |  |  |  |     |
| 12 | Lofepamine      | N06AA07 | AC | S | 140  |      |  |  |  |     |
| 13 | Loprazolam      | N05CD11 |    | S | 1    |      |  |  |  |     |
| 14 | Loratadine      | R06AX13 |    | S | 10   |      |  |  |  |     |
| 15 | Lorazepam       | N05BA06 |    | S | 0.5  | 0.5  |  |  |  |     |
| 16 | Lormetazepam    | N05CD06 |    | S | 0.5  |      |  |  |  |     |
| 17 | Loxapine        | N05AH01 | AC | S |      |      |  |  |  | 4.5 |
| 18 | Meclozine       | R06AE05 | AC | S | 25   |      |  |  |  |     |
| 19 |                 | R06AE55 |    |   |      |      |  |  |  |     |
| 20 | Memantine       | N06DX01 |    | S | 20   |      |  |  |  |     |
| 21 | Meptazinol      | N02AX05 |    | S | 800  |      |  |  |  |     |
| 22 | Methadone       | N07BC02 |    | S | 5    |      |  |  |  |     |
| 23 | Methocarbamol   | M03BA03 | AC | S | 2250 |      |  |  |  |     |
| 24 | Methyldopa      | C02AB01 |    | S | 500  |      |  |  |  |     |
| 25 | Metoclopramide  | A03FA01 |    | S | 15   | 15   |  |  |  |     |
| 26 |                 | N02BE51 |    |   |      |      |  |  |  |     |
| 27 | Mianserin       | N06AX03 |    | S | 30   |      |  |  |  |     |
| 28 | Mirtazepine     | N06AX11 |    | S | 15   |      |  |  |  |     |
| 29 | Morphine        | N02AA01 |    | S | 20   | 6.7  |  |  |  |     |
| 30 |                 | N02AA51 |    |   |      |      |  |  |  |     |
| 31 | Moxonidine      | C02AC05 |    | S | 0.2  |      |  |  |  |     |
| 32 | Nefopam         | N02BG06 | AC | S | 90   |      |  |  |  |     |
| 33 | Nitrazepam      | N05CD02 |    | S | 2.5  |      |  |  |  |     |
| 34 | Nortriptyline   | N06AA10 | AC | S | 30   |      |  |  |  |     |
| 35 |                 |         |    |   |      |      |  |  |  |     |
| 36 |                 |         |    |   |      |      |  |  |  |     |
| 37 |                 |         |    |   |      |      |  |  |  |     |
| 38 |                 |         |    |   |      |      |  |  |  |     |
| 39 |                 |         |    |   |      |      |  |  |  |     |
| 40 |                 |         |    |   |      |      |  |  |  |     |
| 41 |                 |         |    |   |      |      |  |  |  |     |
| 42 |                 |         |    |   |      |      |  |  |  |     |
| 43 |                 |         |    |   |      |      |  |  |  |     |
| 44 |                 |         |    |   |      |      |  |  |  |     |
| 45 |                 |         |    |   |      |      |  |  |  |     |
| 46 |                 |         |    |   |      |      |  |  |  |     |
| 47 |                 |         |    |   |      |      |  |  |  |     |

|    |                  |         |    |   |       |      |      |   |    |  |
|----|------------------|---------|----|---|-------|------|------|---|----|--|
| 1  |                  |         |    |   |       |      |      |   |    |  |
| 2  |                  |         |    |   |       |      |      |   |    |  |
| 3  |                  |         |    |   |       |      |      |   |    |  |
| 4  |                  |         |    |   |       |      |      |   |    |  |
| 5  | Olanzapine       | N05AH03 | AC | S | 5     | 5    |      |   |    |  |
| 6  | Orphenadrine     | N04AB02 | AC |   | 100   |      |      |   |    |  |
| 7  | Oxazepam         | N05BA04 |    | S | 15    |      |      |   |    |  |
| 8  | Oxcarbazepine    | N03AF02 |    | S | 600   |      |      |   |    |  |
| 9  | Oxybutynin       | G04BD04 | AC | S | 5     |      | 1.95 |   |    |  |
| 10 | Oxycodone        | N02AA05 |    | S | 20    | 10   |      |   | 20 |  |
| 11 |                  | N02AA55 |    |   |       |      |      |   |    |  |
| 12 | Paliperidone     | N05AX13 |    | S | 3     | 0.89 |      |   |    |  |
| 13 | Paroxetine       | N06AB05 | AC | S | 20    |      |      |   |    |  |
| 14 | Pentazocine      | N02AD01 |    | S | 300   | 180  |      |   |    |  |
| 15 | Perampanel       | N03AX22 |    | S | 4     |      |      |   |    |  |
| 16 | Pericyazine      | N05AC01 | AC | S | 5     |      |      |   |    |  |
| 17 | Perphenazine     | N05AB03 | AC | S | 3     |      |      |   |    |  |
| 18 | Pethidine        | N02AB02 |    | S | 300   | 150  |      |   |    |  |
| 19 | Phenelzine       | N06AF03 |    | S | 7.5   |      |      |   |    |  |
| 20 | Phenobarbital    | N03AA02 |    | S | 60    | 60   |      |   |    |  |
| 21 | Phenytoin        | N03AB02 |    | S | 200   | 200  |      |   |    |  |
| 22 | Pimozide         | N05AG02 | AC | S | 2     |      |      |   |    |  |
| 23 | Pizotifen        | N02CX01 | AC | S | 1.5   |      |      |   |    |  |
| 24 | Pramipexole      | N04BC05 |    | S | 0.088 |      |      |   |    |  |
| 25 | Prazepam         | N05BA11 |    | S | 10    |      |      |   |    |  |
| 26 | Prazosin         | C02CA01 |    | S | 2     |      |      |   |    |  |
| 27 | Pregabalin       | N03AX16 |    | S | 150   |      |      |   |    |  |
| 28 | Primidone        | N03AA03 |    | S | 750   |      |      |   |    |  |
| 29 | Prochlorperazine | N05AB04 | AC | S | 10    | 1.25 |      | 4 |    |  |
| 30 | Procyclidine     | N04AA04 | AC |   | 7.5   |      |      |   |    |  |
| 31 | Promazine        | N05AA03 | AC | S | 100   |      |      |   |    |  |
| 32 | Promethazine     | R06AD02 | AC | S | 20    | 5    |      |   |    |  |
| 33 | Propantheline    | A03AB05 | AC |   | 22.5  |      |      |   |    |  |
| 34 |                  |         |    |   |       |      |      |   |    |  |
| 35 |                  |         |    |   |       |      |      |   |    |  |
| 36 |                  |         |    |   |       |      |      |   |    |  |
| 37 |                  |         |    |   |       |      |      |   |    |  |
| 38 |                  |         |    |   |       |      |      |   |    |  |
| 39 |                  |         |    |   |       |      |      |   |    |  |
| 40 |                  |         |    |   |       |      |      |   |    |  |
| 41 |                  |         |    |   |       |      |      |   |    |  |
| 42 |                  |         |    |   |       |      |      |   |    |  |
| 43 |                  |         |    |   |       |      |      |   |    |  |
| 44 |                  |         |    |   |       |      |      |   |    |  |
| 45 |                  |         |    |   |       |      |      |   |    |  |
| 46 |                  |         |    |   |       |      |      |   |    |  |
| 47 |                  |         |    |   |       |      |      |   |    |  |



|                |         |    |   |      |      |  |  |  |
|----------------|---------|----|---|------|------|--|--|--|
| Venlafaxine    | N06AX16 |    | S | 75   |      |  |  |  |
| Vigabatrin     | N03AG04 |    | S | 2000 |      |  |  |  |
| Zaleplon       | N05CF03 |    | S | 5    |      |  |  |  |
| Ziprasidone    | N05AE04 |    | S | 40   |      |  |  |  |
| Zolpidem       | N05CF02 |    | S | 5    |      |  |  |  |
| Zonisamide     | N03AX15 |    | S | 300  |      |  |  |  |
| Zopiclone      | N05CF01 |    | S | 3.75 |      |  |  |  |
| Zuclopenthixol | N05AF05 | AC | S | 20   | 11.4 |  |  |  |

WHO ATC, World Health Organisation Anatomical Therapeutic Classification

\*Minimum effective daily dose if taken concurrently with agents that induce hepatic enzymes including phenytoin, carbamazepine, phenobarbitone, primidone, rifampicin and lopinavir/ritonavir.

**Supplementary Table S2.** Drug Burden Index (DBI) medications included in a previous study in the USA<sup>20</sup> but not included in the master DBI list

| <b>Medications not included in master DBI list</b> | <b>Reason for non-inclusion in master DBI list</b> |
|----------------------------------------------------|----------------------------------------------------|
| Astemizole                                         | Not licensed in Ireland                            |
| Azatadine                                          | Not licensed in Ireland                            |
| Belladonna                                         | Not licensed in Ireland                            |
| Benzonatate                                        | Not licensed in Ireland                            |
| Butalbital                                         | Not licensed in Ireland                            |
| Carisoprodol                                       | Not licensed in Ireland                            |
| Chlorprothixine                                    | Not licensed in Ireland                            |
| Chlorzoxazone                                      | Not licensed in Ireland                            |
| Clidinium                                          | Not licensed in Ireland                            |
| Clorazepate                                        | Not licensed in Ireland                            |
| Cyclobenzaprine                                    | Not licensed in Ireland                            |
| Desipramine                                        | Not licensed in Ireland                            |
| Dexbrompheniramine                                 | Not licensed in Ireland                            |
| Dextromethorphan                                   | Does not meet study definitions for DBI medication |
| Dichloralphenazone                                 | Not licensed in Ireland                            |
| Estalozam                                          | Not licensed in Ireland                            |
| Guanabenz                                          | Not licensed in Ireland                            |
| Guanethidine                                       | Not licensed in Ireland                            |
| Guanfacine                                         | Not licensed for use in the elderly in Ireland     |
| Hexobarbital                                       | Not licensed in Ireland                            |
| Hydrocodone                                        | Not licensed in Ireland                            |
| Loperamide                                         | Does not meet study definitions for DBI medication |
| Meprobamate                                        | Not licensed in Ireland                            |
| Metaxalone                                         | Not licensed in Ireland                            |
| Methscopolamine                                    | Not licensed in Ireland                            |
| Nefazodone                                         | Not licensed in Ireland                            |
| Opium                                              | Not licensed in Ireland                            |
| Papaverine                                         | Not licensed in Ireland                            |
| Pheniramine                                        | Not licensed in Ireland                            |
| Phenyltoloxamine                                   | Not licensed in Ireland                            |
| Propoxyphene                                       | Not licensed in Ireland                            |
| Reserpine                                          | Not licensed in Ireland                            |
| Selegiline                                         | Does not meet study definitions for DBI medication |
| Tamsulosin                                         | Does not meet study definitions for DBI medication |
| Thioridazine                                       | Not licensed in Ireland                            |
| Tranlycypromine                                    | Does not meet study definitions for DBI medication |
| Triflupromazine                                    | Not licensed in Ireland                            |
| Trimethobenzamide                                  | Not licensed in Ireland                            |
| Tripelennamine                                     | Not licensed in Ireland                            |

**Supplementary Table S3.** Drug Burden Index (DBI) medications included in the master DBI list but not listed as DBI medications taken by participants in a previous USA study<sup>20</sup>

---

1  
2  
3  
4  
5 Alimemazine  
6 Amantadine  
7 Amisulpride  
8 Aripiprazole  
9 Asenapine  
10 Atropine  
11 Baclofen  
12 Benperidol  
13 Biperiden  
14 Buclizine  
15 Buprenorphine  
16 Cloral Hydrate  
17 Cinnarizine  
18 Clobazam  
19 Clomethiazole  
20 Clozapine  
21 Cyclizine  
22 Darifenacin  
23 Dicycloverine  
24 Dihydrocodeine  
25 Diphenoxylate  
26 Dosulepin  
27 Duloxetine  
28 Fesoterodine  
29 Fexofenadine  
30 Flunitrazepam  
31 Flupentixol  
32 Fluvoxamine  
33 Glycopyrronium  
34 Hydromorphone  
35 Hyoscine base  
36 Hyoscine Butylbromide  
37 Hyoscine Hydrobromide  
38 Indoramin  
39 Levocetirizine  
40 Levomepromazine  
41 Lofepamine  
42 Loprazolam  
43 Lormetazepam  
44 Memantine  
45 Meptazinol  
46 Mianserin  
47 Moxonidine  
48 Nefopam  
49  
50  
51  
52  
53  
54  
55  
56  
57  
58  
59  
60

1  
2  
3 Nitrazepam  
4 Paliperidone  
5 Perampanel  
6 Pericyazine  
7 Pethidine  
8 Pimozide  
9 Pizotifen  
10 Prazepam  
11 Pregabalin  
12 Procyclidine  
13 Promazine  
14 Propiverine  
15 Retigabine  
16 Rotigotine  
17 Rufinamide  
18 Solifenacin  
19 Sulpiride  
20 Tapentadol  
21 Tizanidine  
22 Topiramate  
23 Trospium  
24 Vigabatrin  
25 Zonisamide  
26 Zopiclone  
27 Zuclopenthixol

---

For peer review only

32  
33  
34  
35  
36  
37  
38  
39  
40  
41  
42  
43  
44  
45  
46  
47  
48  
49  
50  
51  
52  
53  
54  
55  
56  
57  
58  
59  
60

**STROBE 2007 (v4) Statement—Checklist of items that should be included in reports of *cross-sectional studies***

| Section/Topic                | Item # | Recommendation                                                                                                                                                                       | Reported on page # |
|------------------------------|--------|--------------------------------------------------------------------------------------------------------------------------------------------------------------------------------------|--------------------|
| <b>Title and abstract</b>    | 1      | (a) Indicate the study's design with a commonly used term in the title or the abstract                                                                                               | 1, 2               |
|                              |        | (b) Provide in the abstract an informative and balanced summary of what was done and what was found                                                                                  | 2                  |
| <b>Introduction</b>          |        |                                                                                                                                                                                      |                    |
| Background/rationale         | 2      | Explain the scientific background and rationale for the investigation being reported                                                                                                 | 4                  |
| Objectives                   | 3      | State specific objectives, including any prespecified hypotheses                                                                                                                     | 4, 5               |
| <b>Methods</b>               |        |                                                                                                                                                                                      |                    |
| Study design                 | 4      | Present key elements of study design early in the paper                                                                                                                              | 5                  |
| Setting                      | 5      | Describe the setting, locations, and relevant dates, including periods of recruitment, exposure, follow-up, and data collection                                                      | 5                  |
| Participants                 | 6      | (a) Give the eligibility criteria, and the sources and methods of selection of participants                                                                                          | 5                  |
| Variables                    | 7      | Clearly define all outcomes, exposures, predictors, potential confounders, and effect modifiers. Give diagnostic criteria, if applicable                                             | 5-7                |
| Data sources/<br>measurement | 8*     | For each variable of interest, give sources of data and details of methods of assessment (measurement). Describe comparability of assessment methods if there is more than one group | 5-7                |
| Bias                         | 9      | Describe any efforts to address potential sources of bias                                                                                                                            | 5-7                |
| Study size                   | 10     | Explain how the study size was arrived at                                                                                                                                            | 5                  |
| Quantitative variables       | 11     | Explain how quantitative variables were handled in the analyses. If applicable, describe which groupings were chosen and why                                                         | 7                  |
| Statistical methods          | 12     | (a) Describe all statistical methods, including those used to control for confounding                                                                                                | 7                  |
|                              |        | (b) Describe any methods used to examine subgroups and interactions                                                                                                                  | 7                  |
|                              |        | (c) Explain how missing data were addressed                                                                                                                                          | NA                 |
|                              |        | (d) If applicable, describe analytical methods taking account of sampling strategy                                                                                                   | NA                 |
|                              |        | (e) Describe any sensitivity analyses                                                                                                                                                | NA                 |
| <b>Results</b>               |        |                                                                                                                                                                                      |                    |



|                          |     |                                                                                                                                                                                                              |            |
|--------------------------|-----|--------------------------------------------------------------------------------------------------------------------------------------------------------------------------------------------------------------|------------|
| Participants             | 13* | (a) Report numbers of individuals at each stage of study—eg numbers potentially eligible, examined for eligibility, confirmed eligible, included in the study, completing follow-up, and analysed            | 7          |
|                          |     | (b) Give reasons for non-participation at each stage                                                                                                                                                         | NA         |
|                          |     | (c) Consider use of a flow diagram                                                                                                                                                                           | NA         |
| Descriptive data         | 14* | (a) Give characteristics of study participants (eg demographic, clinical, social) and information on exposures and potential confounders                                                                     | 7          |
|                          |     | (b) Indicate number of participants with missing data for each variable of interest                                                                                                                          | NA         |
| Outcome data             | 15* | Report numbers of outcome events or summary measures                                                                                                                                                         | 7, 8       |
| Main results             | 16  | (a) Give unadjusted estimates and, if applicable, confounder-adjusted estimates and their precision (eg, 95% confidence interval). Make clear which confounders were adjusted for and why they were included | 7, Table 1 |
|                          |     | (b) Report category boundaries when continuous variables were categorized                                                                                                                                    | 7          |
|                          |     | (c) If relevant, consider translating estimates of relative risk into absolute risk for a meaningful time period                                                                                             | NA         |
| Other analyses           | 17  | Report other analyses done—eg analyses of subgroups and interactions, and sensitivity analyses                                                                                                               | 7, 8       |
| <b>Discussion</b>        |     |                                                                                                                                                                                                              |            |
| Key results              | 18  | Summarise key results with reference to study objectives                                                                                                                                                     | 8, 9       |
| Limitations              | 19  | Discuss limitations of the study, taking into account sources of potential bias or imprecision. Discuss both direction and magnitude of any potential bias                                                   | 10         |
| Interpretation           | 20  | Give a cautious overall interpretation of results considering objectives, limitations, multiplicity of analyses, results from similar studies, and other relevant evidence                                   | 10, 11     |
| Generalisability         | 21  | Discuss the generalisability (external validity) of the study results                                                                                                                                        | 9, 10      |
| <b>Other information</b> |     |                                                                                                                                                                                                              |            |
| Funding                  | 22  | Give the source of funding and the role of the funders for the present study and, if applicable, for the original study on which the present article is based                                                | 11         |

\*Give information separately for cases and controls in case-control studies and, if applicable, for exposed and unexposed groups in cohort and cross-sectional studies.

**Note:** An Explanation and Elaboration article discusses each checklist item and gives methodological background and published examples of transparent reporting. The STROBE checklist is best used in conjunction with this article (freely available on the Web sites of PLoS Medicine at <http://www.plosmedicine.org/>, Annals of Internal Medicine at <http://www.annals.org/>, and Epidemiology at <http://www.epidem.com/>). Information on the STROBE Initiative is available at [www.strobe-statement.org](http://www.strobe-statement.org).
