# Supplementary material for: Anticholinergic and sedative drug burden in community-dwelling older people: a national database study
Source: PubMed Central journal article supplement — BMJ Open. 2018 Jul 6;8(7):e022500. doi: 10.1136/bmjopen-2018-022500 (PMC6045724; doi:10.1136/bmjopen-2018-022500), 2018-07-06
Supplement: bmjopen-2018-022500supp001.pdf [file bmjopen-2018-022500supp001.pdf]

**Supplementary Table S1.** Master Drug Burden Index (DBI) list - medications for inclusion in the calculation of DBI

| Drug             | WHO ATC Code/s     | Anticholinergic effects (AC) | Sedative effects (S) | Minimum effective daily dose by route of administration (mg) |            |                   |             |        |            |
|------------------|--------------------|------------------------------|----------------------|--------------------------------------------------------------|------------|-------------------|-------------|--------|------------|
|                  |                    |                              |                      | Oral                                                         | Parenteral | Sublingual/buccal | Transdermal | Rectal | Inhalation |
| Alimemazine      | R06AD01            | AC                           | S                    | 10                                                           |            |                   |             |        |            |
| Alprazolam       | N05BA12            |                              | S                    | 0.5                                                          |            |                   |             |        |            |
| Amantadine       | N04BB01            | AC                           |                      | 100                                                          |            |                   |             |        |            |
| Amisulpride      | N05AL05            |                              | S                    | 50                                                           |            |                   |             |        |            |
| Amitriptyline    | N06AA09            | AC                           | S                    | 10                                                           |            |                   |             |        |            |
| Aripiprazole     | N05AX12            |                              | S                    | 10                                                           | 10         |                   |             |        |            |
| Asenapine        | N05AH05            |                              | S                    |                                                              |            | 10                |             |        |            |
| Atropine         | A03BA01<br>A03CB03 | AC                           |                      | 0.6                                                          | 0.3        |                   |             |        |            |
| Baclofen         | M03BX01            |                              | S                    | 30                                                           | 30         |                   |             |        |            |
| Benperidol       | N05AD07            |                              | S                    | 0.125                                                        |            |                   |             |        |            |
| Benzatropine     | N04AC01            | AC                           |                      | 0.5                                                          | 0.5        |                   |             |        |            |
| Biperiden        | N04AA02            | AC                           | S                    | 1                                                            |            |                   |             |        |            |
| Brompheniramine  | R06AB01<br>R06AB51 | AC                           | S                    | 16                                                           |            |                   |             |        |            |
| Buclizine        | R06AE51<br>R06AE01 | AC                           | S                    | 12.5                                                         |            |                   |             |        |            |
| Buprenorphine    | N02AE01            |                              | S                    |                                                              | 0.12       | 0.4               | 0.12        |        |            |
| Buspirone        | N05BE01            |                              | S                    | 15                                                           |            |                   |             |        |            |
| Carbamazepine    | N03AF01            | AC                           | S                    | 400                                                          |            |                   |             | 500    |            |
| Cetirizine       | R06AE07            |                              | S                    | 10                                                           |            |                   |             |        |            |
| Cloral Hydrate   | N05CC01            |                              | S                    | 430                                                          |            |                   |             |        |            |
| Chlordiazepoxide | N05BA02            |                              | S                    | 5                                                            |            |                   |             |        |            |
| Chlorphenamine   | R06AB04            | AC                           | S                    | 8                                                            | 3          |                   |             |        |            |
| Chlorpromazine   | N05AA01            | AC                           | S                    | 30                                                           | 6          |                   |             |        |            |
| Cinnarizine      | N07CA02            | AC                           | S                    | 60                                                           |            |                   |             |        |            |

|                     |                                          |    |   |     |     |  |  |   |  |
|---------------------|------------------------------------------|----|---|-----|-----|--|--|---|--|
|                     | N07CA52                                  |    |   |     |     |  |  |   |  |
| Citalopram          | N06AB04                                  |    | S | 10  |     |  |  |   |  |
| Clemastine          | R06AA04<br>R06AA54                       | AC | S | 2   |     |  |  |   |  |
| Clobazam            | N05BA09                                  |    | S | 10  |     |  |  |   |  |
| Clomethiazole       | N05CM0<br>N05CX04                        |    | S | 192 |     |  |  |   |  |
| Clomipramine        | N06AA04                                  | AC | S | 30  |     |  |  |   |  |
| Clonazepam          | N03AE01                                  |    | S | 0.5 | 0.5 |  |  |   |  |
| Clonidine           | N02CX02<br>C02AC01                       |    | S | 0.1 |     |  |  |   |  |
| Clozapine           | N05AH02                                  | AC | S | 25  |     |  |  |   |  |
| Codeine             | R05DA04<br>N02AJ06                       |    | S | 120 |     |  |  |   |  |
| Cyclizine           | R06AE03<br>N02AA51                       | AC | S | 50  | 50  |  |  |   |  |
| Cyproheptadine      | R06AX02                                  | AC | S | 4   |     |  |  |   |  |
| Darifenacin         | G04BD10                                  | AC |   | 7.5 |     |  |  |   |  |
| Dexchlorpheniramine | R06AB02<br>R06AB52                       | AC | S | 8   |     |  |  |   |  |
| Diazepam            | N05BA01                                  |    | S | 1   | 1   |  |  | 1 |  |
| Dicycloverine       | A03AA07                                  | AC |   | 30  |     |  |  |   |  |
| Dihydrocodeine      | N02AA08<br>N02AJ01                       |    | S | 40  |     |  |  |   |  |
| Dimenhydrinate      | R06AA02<br>N07CA52                       | AC | S | 150 |     |  |  |   |  |
| Diphenhydramine     | N02BE71<br>N02BE51<br>R06AA02<br>R06AA52 | AC | S | 50  |     |  |  |   |  |
| Diphenoxylate       | A07DA01                                  |    | S | 5   |     |  |  |   |  |

|                       |                               |    |   |       |      |     |     |  |  |
|-----------------------|-------------------------------|----|---|-------|------|-----|-----|--|--|
| Disopyramide          | C01BA03                       | AC |   | 300   | 300  |     |     |  |  |
| Dosulepin             | N06AA16                       | AC | S | 50    |      |     |     |  |  |
| Doxazosin             | C02CA04                       |    | S | 2     |      |     |     |  |  |
| Doxepin               | N06AA12                       | AC | S | 25    |      |     |     |  |  |
| Doxylamine            | R06AA09<br>R06AA59<br>N02BE51 | AC | S | 25    |      |     |     |  |  |
| Duloxetine            | N06AX21                       |    | S | 30    |      |     |     |  |  |
| Escitalopram          | N06AB10                       |    | S | 5     |      |     |     |  |  |
| Fentanyl              | N02AB03                       |    | S |       | 0.3  | 0.6 | 0.3 |  |  |
| Fesoterodine          | G04BD11                       | AC |   | 4     |      |     |     |  |  |
| Fexofenadine          | R06AX26                       |    | S | 120   |      |     |     |  |  |
| Flavoxate             | G04BD02                       | AC | S | 600   |      |     |     |  |  |
| Flunitrazepam         | N05CD03                       |    | S | 0.5   |      |     |     |  |  |
| Fluoxetine            | N06AB03                       |    | S | 20    |      |     |     |  |  |
| Flupentixol           | N05AF01                       | AC | S | 0.5   | 0.3  |     |     |  |  |
| Fluphenazine          | N05AB02                       | AC | S |       | 0.36 |     |     |  |  |
| Flurazepam            | N05CD01                       |    | S | 15    |      |     |     |  |  |
| Fluvoxamine           | N06AB08                       |    | S | 100   |      |     |     |  |  |
| Gabapentin            | N03AX12                       |    | S | 900   |      |     |     |  |  |
| Glycopyrronium        | A03AB02                       | AC | S | 2     | 0.2  |     |     |  |  |
| Haloperidol           | N05AD01                       |    | S | 0.5   | 0.25 |     |     |  |  |
| Hydromorphone         | N02AA03                       |    | S | 7.8   | 2.6  |     |     |  |  |
| Hydroxyzine           | N05BB01                       | AC | S | 25    |      |     |     |  |  |
| Hyoscine base         | A04AD01                       | AC | S |       |      |     | 0.5 |  |  |
| Hyoscine Butylbromide | A03BB01                       | AC |   | 30    | 30   |     |     |  |  |
| Hyoscine Hydrobromide | A04AD01                       | AC | S | 0.9   |      |     | 0.5 |  |  |
| Hyoscyamine           | A03CB31<br>A03BA03            | AC |   | 0.375 |      |     |     |  |  |

|                 |                    |    |   |             |      |  |  |     |
|-----------------|--------------------|----|---|-------------|------|--|--|-----|
| Imipramine      | N06AA02            | AC | S | 30          |      |  |  |     |
| Indoramin       | C02CA02            |    | S | 20          |      |  |  |     |
| Lamotrigine     | N03AX09            |    | S | 100<br>200* |      |  |  |     |
| Levetiracetam   | N03AX14            |    | S | 1000        |      |  |  |     |
| Levocetirizine  | R06AE09            |    | S | 5           |      |  |  |     |
| Levomepromazine | N05AA02            | AC | S | 37.5        | 37.5 |  |  |     |
| Lofepramine     | N06AA07            | AC | S | 140         |      |  |  |     |
| Loprazolam      | N05CD11            |    | S | 1           |      |  |  |     |
| Loratadine      | R06AX13            |    | S | 10          |      |  |  |     |
| Lorazepam       | N05BA06            |    | S | 0.5         | 0.5  |  |  |     |
| Lormetazepam    | N05CD06            |    | S | 0.5         |      |  |  |     |
| Loxapine        | N05AH01            | AC | S |             |      |  |  | 4.5 |
| Meclozine       | R06AE05<br>R06AE55 | AC | S | 25          |      |  |  |     |
| Memantine       | N06DX01            |    | S | 20          |      |  |  |     |
| Meptazinol      | N02AX05            |    | S | 800         |      |  |  |     |
| Methadone       | N07BC02            |    | S | 5           |      |  |  |     |
| Methocarbamol   | M03BA03            | AC | S | 2250        |      |  |  |     |
| Methyldopa      | C02AB01            |    | S | 500         |      |  |  |     |
| Metoclopramide  | A03FA01<br>N02BE51 |    | S | 15          | 15   |  |  |     |
| Mianserin       | N06AX03            |    | S | 30          |      |  |  |     |
| Mirtazepine     | N06AX11            |    | S | 15          |      |  |  |     |
| Morphine        | N02AA01<br>N02AA51 |    | S | 20          | 6.7  |  |  |     |
| Moxonidine      | C02AC05            |    | S | 0.2         |      |  |  |     |
| Nefopam         | N02BG06            | AC | S | 90          |      |  |  |     |
| Nitrazepam      | N05CD02            |    | S | 2.5         |      |  |  |     |
| Nortriptyline   | N06AA10            | AC | S | 30          |      |  |  |     |

|                  |                    |    |   |       |      |   |      |    |  |
|------------------|--------------------|----|---|-------|------|---|------|----|--|
| Olanzapine       | N05AH03            | AC | S | 5     | 5    |   |      |    |  |
| Orphenadrine     | N04AB02            | AC |   | 100   |      |   |      |    |  |
| Oxazepam         | N05BA04            |    | S | 15    |      |   |      |    |  |
| Oxcarbazepine    | N03AF02            |    | S | 600   |      |   |      |    |  |
| Oxybutynin       | G04BD04            | AC | S | 5     |      |   | 1.95 |    |  |
| Oxycodone        | N02AA05<br>N02AA55 |    | S | 20    | 10   |   |      | 20 |  |
| Paliperidone     | N05AX13            |    | S | 3     | 0.89 |   |      |    |  |
| Paroxetine       | N06AB05            | AC | S | 20    |      |   |      |    |  |
| Pentazocine      | N02AD01            |    | S | 300   | 180  |   |      |    |  |
| Perampanel       | N03AX22            |    | S | 4     |      |   |      |    |  |
| Pericyazine      | N05AC01            | AC | S | 5     |      |   |      |    |  |
| Perphenazine     | N05AB03            | AC | S | 3     |      |   |      |    |  |
| Pethidine        | N02AB02            |    | S | 300   | 150  |   |      |    |  |
| Phenelzine       | N06AF03            |    | S | 7.5   |      |   |      |    |  |
| Phenobarbital    | N03AA02            |    | S | 60    | 60   |   |      |    |  |
| Phenytoin        | N03AB02            |    | S | 200   | 200  |   |      |    |  |
| Pimozide         | N05AG02            | AC | S | 2     |      |   |      |    |  |
| Pizotifen        | N02CX01            | AC | S | 1.5   |      |   |      |    |  |
| Pramipexole      | N04BC05            |    | S | 0.088 |      |   |      |    |  |
| Prazepam         | N05BA11            |    | S | 10    |      |   |      |    |  |
| Prazosin         | C02CA01            |    | S | 2     |      |   |      |    |  |
| Pregabalin       | N03AX16            |    | S | 150   |      |   |      |    |  |
| Primidone        | N03AA03            |    | S | 750   |      |   |      |    |  |
| Prochlorperazine | N05AB04            | AC | S | 10    | 1.25 | 4 |      |    |  |
| Procyclidine     | N04AA04            | AC |   | 7.5   |      |   |      |    |  |
| Promazine        | N05AA03            | AC | S | 100   |      |   |      |    |  |
| Promethazine     | R06AD02            | AC | S | 20    | 5    |   |      |    |  |
| Propantheline    | A03AB05            | AC |   | 22.5  |      |   |      |    |  |

|                 |                    |    |   |           |     |  |   |  |  |
|-----------------|--------------------|----|---|-----------|-----|--|---|--|--|
| Propiverine     | G04BD06            | AC | S | 15        |     |  |   |  |  |
| Quetiapine      | N05AH04            | AC | S | 50        |     |  |   |  |  |
| Retigabine      | N03AX21            |    | S | 600       |     |  |   |  |  |
| Risperidone     | N05AX08            |    | S | 1         | 0.7 |  |   |  |  |
| Ropinirole      | N04BC04            |    | S | 2         |     |  |   |  |  |
| Rotigotine      | N04BC09            |    | S |           |     |  | 1 |  |  |
| Rufinamide      | N03AF03            |    | S | 400       |     |  |   |  |  |
| Sertraline      | N06AB06            |    | S | 50        |     |  |   |  |  |
| Solifenacin     | G04BD08<br>G04CA53 | AC |   | 5         |     |  |   |  |  |
| Sulpiride       | N05AL01            | AC | S | 400       |     |  |   |  |  |
| Tapentadol      | N02AX06            |    | S | 100       |     |  |   |  |  |
| Temazepam       | N05CD07            |    | S | 5         |     |  |   |  |  |
| Terazosin       | G04CA03            |    | S | 2         |     |  |   |  |  |
| Tiagabine       | N03AG06            |    | S | 15<br>30* |     |  |   |  |  |
| Tizanidine      | M03BX02            | AC | S | 6         |     |  |   |  |  |
| Tolterodine     | G04BD07            | AC | S | 2         |     |  |   |  |  |
| Topiramate      | N03AX11            |    | S | 50        |     |  |   |  |  |
| Tramadol        | N02AX02<br>N02AJ13 |    | S | 200       | 200 |  |   |  |  |
| Trazodone       | N06AX05            |    | S | 100       |     |  |   |  |  |
| Triazolam       | N05CD05            |    | S | 0.125     |     |  |   |  |  |
| Trifluoperazine | N05AB06            | AC | S | 2         |     |  |   |  |  |
| Trihexyphenidyl | N04AA01            | AC |   | 5         |     |  |   |  |  |
| Trimipramine    | N06AA06            | AC | S | 37.5      |     |  |   |  |  |
| Triprolidine    | R06AX07            | AC | S | 10        |     |  |   |  |  |
| Tropium         | G04BD09            | AC |   | 40        |     |  |   |  |  |
| Valproic Acid   | N03AG01            |    | S | 1000      |     |  |   |  |  |

|                |         |    |   |      |      |  |  |  |  |
|----------------|---------|----|---|------|------|--|--|--|--|
| Venlafaxine    | N06AX16 |    | S | 75   |      |  |  |  |  |
| Vigabatrin     | N03AG04 |    | S | 2000 |      |  |  |  |  |
| Zaleplon       | N05CF03 |    | S | 5    |      |  |  |  |  |
| Ziprasidone    | N05AE04 |    | S | 40   |      |  |  |  |  |
| Zolpidem       | N05CF02 |    | S | 5    |      |  |  |  |  |
| Zonisamide     | N03AX15 |    | S | 300  |      |  |  |  |  |
| Zopiclone      | N05CF01 |    | S | 3.75 |      |  |  |  |  |
| Zuclopenthixol | N05AF05 | AC | S | 20   | 11.4 |  |  |  |  |

WHO ATC, World Health Organisation Anatomical Therapeutic Classification

\*Minimum effective daily dose if taken concurrently with agents that induce hepatic enzymes including phenytoin, carbamazepine, phenobarbitone, primidone, rifampicin and lopinavir/ritonavir.
