# Supplementary material for: Anticholinergic and sedative drug burden in community-dwelling older people: a national database study
Source: PubMed Central journal article supplement — BMJ Open. 2018 Jul 6;8(7):e022500. doi: 10.1136/bmjopen-2018-022500 (PMC6045724; doi:10.1136/bmjopen-2018-022500), 2018-07-06
Supplement: bmjopen-2018-022500supp002.pdf [file bmjopen-2018-022500supp002.pdf]

**Supplementary Table S2.** Drug Burden Index (DBI) medications included in a previous study in the USA<sup>20</sup> but not included in the master DBI list

| <b>Medications not included in master DBI list</b> | <b>Reason for non-inclusion in master DBI list</b> |
|----------------------------------------------------|----------------------------------------------------|
| Astemizole                                         | Not licensed in Ireland                            |
| Azatadine                                          | Not licensed in Ireland                            |
| Belladonna                                         | Not licensed in Ireland                            |
| Benzonatate                                        | Not licensed in Ireland                            |
| Butalbital                                         | Not licensed in Ireland                            |
| Carisoprodol                                       | Not licensed in Ireland                            |
| Chlorprothixine                                    | Not licensed in Ireland                            |
| Chlorzoxazone                                      | Not licensed in Ireland                            |
| Clidinium                                          | Not licensed in Ireland                            |
| Clorazepate                                        | Not licensed in Ireland                            |
| Cyclobenzaprine                                    | Not licensed in Ireland                            |
| Desipramine                                        | Not licensed in Ireland                            |
| Dexbrompheniramine                                 | Not licensed in Ireland                            |
| Dextromethorphan                                   | Does not meet study definitions for DBI medication |
| Dichloralphenazone                                 | Not licensed in Ireland                            |
| Estalozam                                          | Not licensed in Ireland                            |
| Guanabenz                                          | Not licensed in Ireland                            |
| Guanethidine                                       | Not licensed in Ireland                            |
| Guanfacine                                         | Not licensed for use in the elderly in Ireland     |
| Hexobarbital                                       | Not licensed in Ireland                            |
| Hydrocodone                                        | Not licensed in Ireland                            |
| Loperamide                                         | Does not meet study definitions for DBI medication |
| Meprobamate                                        | Not licensed in Ireland                            |
| Metaxalone                                         | Not licensed in Ireland                            |
| Methscopolamine                                    | Not licensed in Ireland                            |
| Nefazodone                                         | Not licensed in Ireland                            |
| Opium                                              | Not licensed in Ireland                            |
| Papaverine                                         | Not licensed in Ireland                            |
| Pheniramine                                        | Not licensed in Ireland                            |
| Phenyltoloxamine                                   | Not licensed in Ireland                            |
| Propoxyphene                                       | Not licensed in Ireland                            |
| Reserpine                                          | Not licensed in Ireland                            |
| Selegiline                                         | Does not meet study definitions for DBI medication |
| Tamsulosin                                         | Does not meet study definitions for DBI medication |
| Thioridazine                                       | Not licensed in Ireland                            |
| Tranlycypromine                                    | Does not meet study definitions for DBI medication |
| Triflupromazine                                    | Not licensed in Ireland                            |
| Trimethobenzamide                                  | Not licensed in Ireland                            |
| Tripelennamine                                     | Not licensed in Ireland                            |
