# Supplementary material for: Anticholinergic and sedative drug burden in community-dwelling older people: a national database study
Source: PubMed Central journal article supplement — BMJ Open. 2018 Jul 6;8(7):e022500. doi: 10.1136/bmjopen-2018-022500 (PMC6045724; doi:10.1136/bmjopen-2018-022500), 2018-07-06
Supplement: bmjopen-2018-022500supp003.pdf [file bmjopen-2018-022500supp003.pdf]

**Supplementary Table S3.** Drug Burden Index (DBI) medications included in the master DBI list but not listed as DBI medications taken by participants in a previous USA study<sup>20</sup>

---

Alimemazine  
Amantadine  
Amisulpride  
Aripiprazole  
Asenapine  
Atropine  
Baclofen  
Benperidol  
Biperiden  
Buclizine  
Buprenorphine  
Cloral Hydrate  
Cinnarizine  
Clobazam  
Clomethiazole  
Clozapine  
Cyclizine  
Darifenacin  
Dicycloverine  
Dihydrocodeine  
Diphenoxylate  
Dosulepin  
Duloxetine  
Fesoterodine  
Fexofenadine  
Flunitrazepam  
Flupentixol  
Fluvoxamine  
Glycopyrronium  
Hydromorphone  
Hyoscine base  
Hyoscine Butylbromide  
Hyoscine Hydrobromide  
Indoramin  
Levocetirizine  
Levomepromazine  
Lofepamine  
Loprazolam  
Lormetazepam  
Memantine  
Meptazinol  
Mianserin  
Moxonidine  
Nefopam

Nitrazepam  
Paliperidone  
Perampanel  
Pericyazine  
Pethidine  
Pimozide  
Pizotifen  
Prazepam  
Pregabalin  
Procyclidine  
Promazine  
Propiverine  
Retigabine  
Rotigotine  
Rufinamide  
Solifenacin  
Sulpiride  
Tapentadol  
Tizanidine  
Topiramate  
Trospium  
Vigabatrin  
Zonisamide  
Zopiclone  
Zuclopenthixol

---
